# Supplementary material
Source: PubMed Central journal article supplement (PMC3391735)
Supplement: NIHMS296231-supplement-1.pdf [file NIHMS296231-supplement-1.pdf]

## **SUPPLEMENTAL INFORMATION**

### **A Unique CaMKII $\beta$ Signaling Pathway at the Centrosome Regulates Dendrite Patterning in the Brain**

Sidharth V. Puram, Albert H. Kim, Yoshiho Ikeuchi, Joshua T. Wilson-Grady, Andreas Merdes,  
Steven P. Gygi, and Azad Bonni

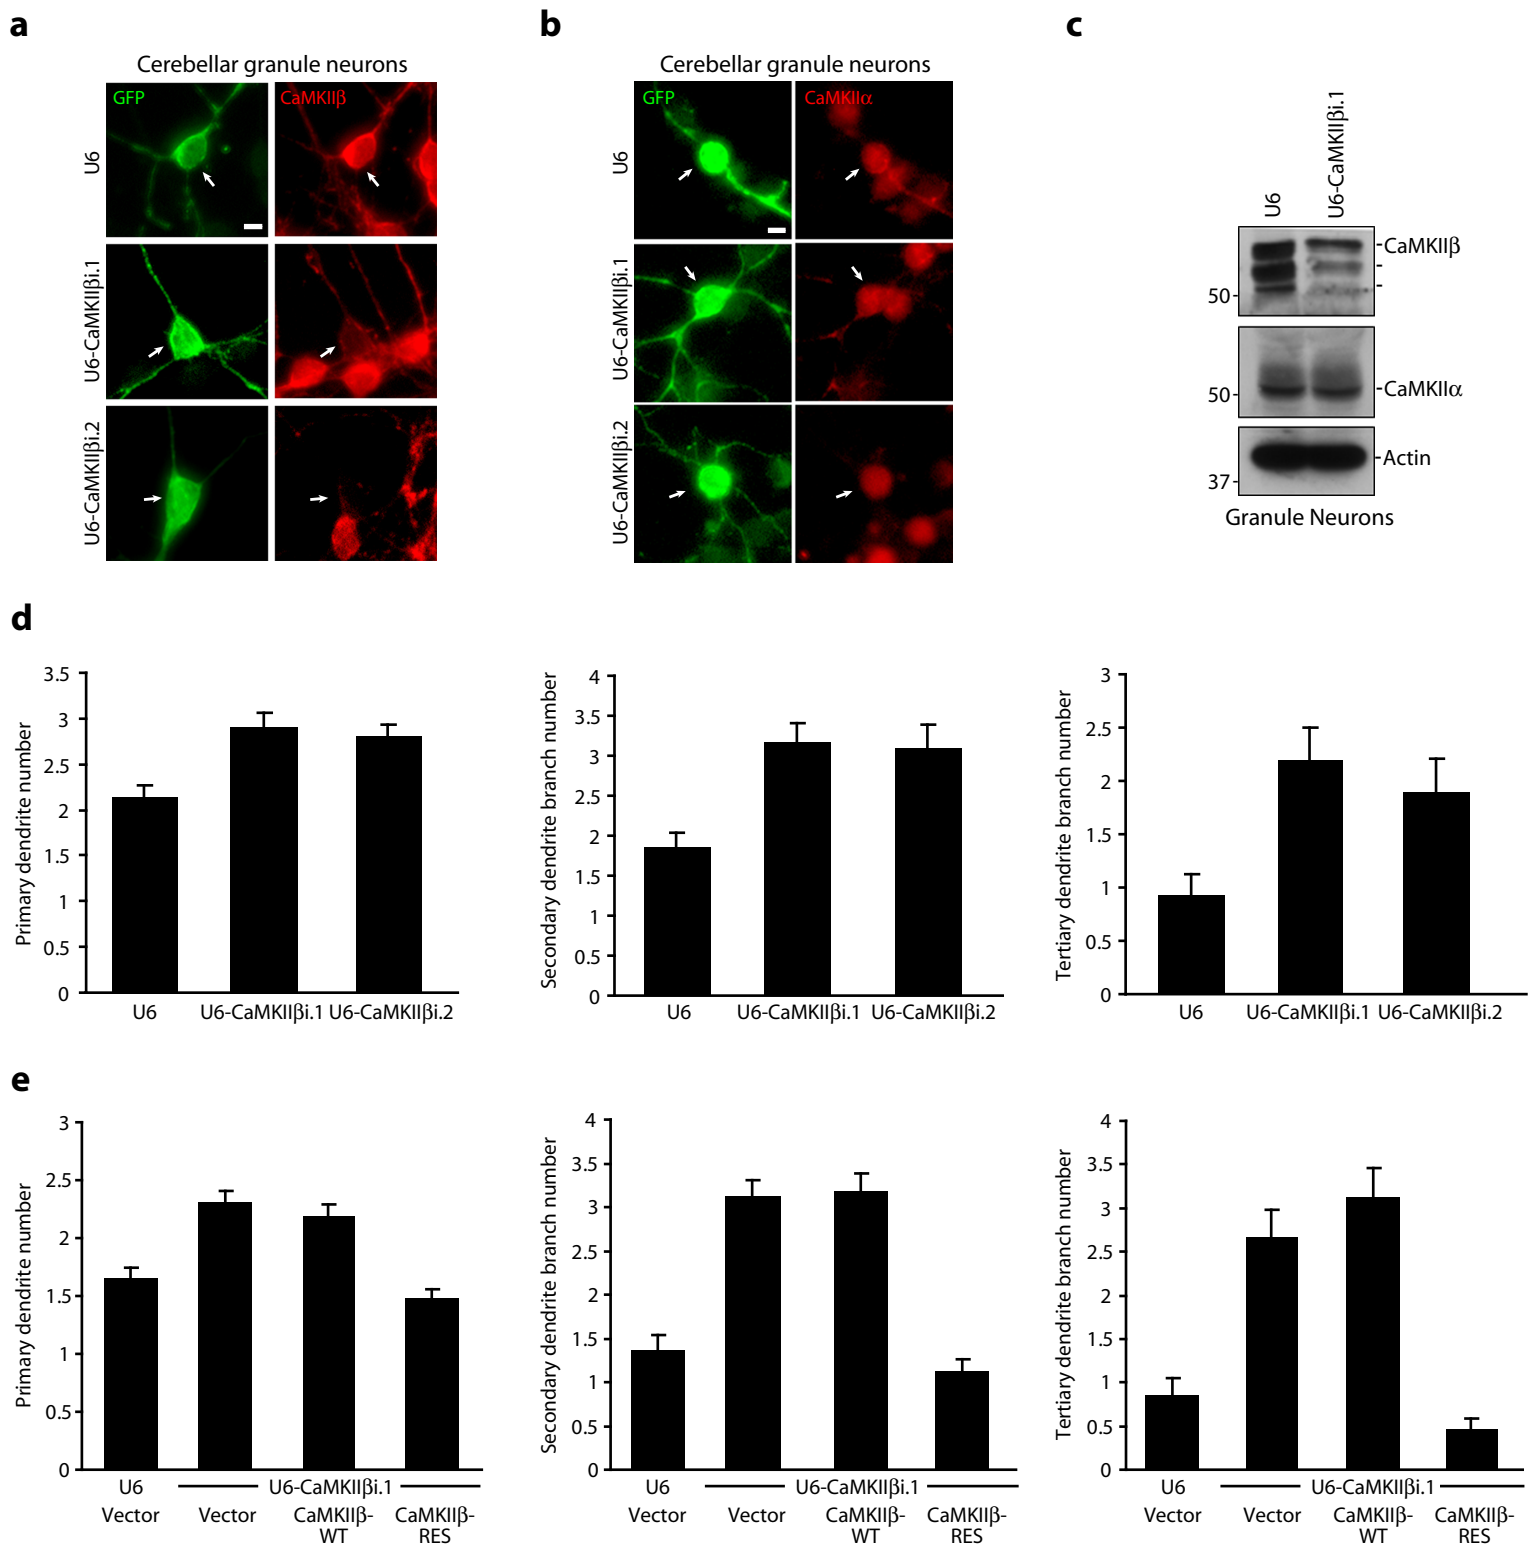

### Supplementary Figure 1. CaMKIIβ specifically controls dendrite arborization in granule neurons.

**a**, Granule neurons transfected with one of two different CaMKIIβ RNAi plasmids (U6-CaMKIIβi) or the control U6 plasmid together with the GFP expression plasmid were subjected to immunocytochemistry using the GFP or CaMKIIβ antibody. Representative neurons are shown. Arrows indicate transfected neurons. CaMKIIβ knockdown significantly reduced CaMKIIβ immunoreactivity in neurons. Scale bar = 5 μm.

**b**, Granule neurons transfected as in (a) were subjected to immunocytochemistry using the GFP or monoclonal CaMKIIα antibody. CaMKIIβ knockdown had little or no effect on the CaMKIIα immunoreactive signal. Scale bar = 5 μm.

**Supplementary Figure 1 (continued).**

**c,** Lysates of granule neurons electroporated with the CaMKII $\beta$  RNAi or control U6 plasmid were immunoblotted with the CaMKII $\beta$ , polyclonal CaMKII $\alpha$ , or Actin antibody.

**d,** Granule neurons transfected with one of two different CaMKII $\beta$  RNAi plasmids (U6-CaMKII $\beta$ i) or the control U6 plasmid together with the GFP expression plasmid were analyzed as in Fig. 1d and quantified for primary dendrite number and secondary and tertiary dendrite branch number. Primary dendrite number was modestly increased in CaMKII $\beta$  knockdown neurons compared to control U6-transfected neurons (ANOVA,  $p < 0.0005$ ). Secondary and tertiary dendrite branch number were significantly increased in CaMKII $\beta$  knockdown neurons compared to control U6-transfected neurons (ANOVA,  $p < 0.005$ ). 266 neurons were analyzed.

**e,** Granule neurons transfected with the CaMKII $\beta$  RNAi or control U6 plasmid together with the expression plasmid encoding CaMKII $\beta$ -WT, CaMKII $\beta$ -RES, or control vector and the GFP expression plasmid were analyzed as in (d). Expression of CaMKII $\beta$ -RES, but not CaMKII $\beta$ -WT, significantly reduced primary dendrite number as well as secondary and tertiary dendrite branch number compared to control vector in the background of CaMKII $\beta$  RNAi (ANOVA,  $p < 0.0001$ ). 348 neurons were analyzed.

**a**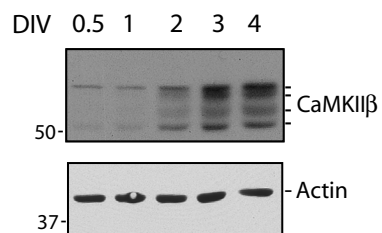**b**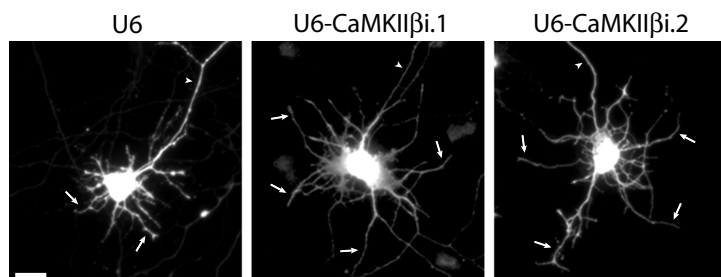**c**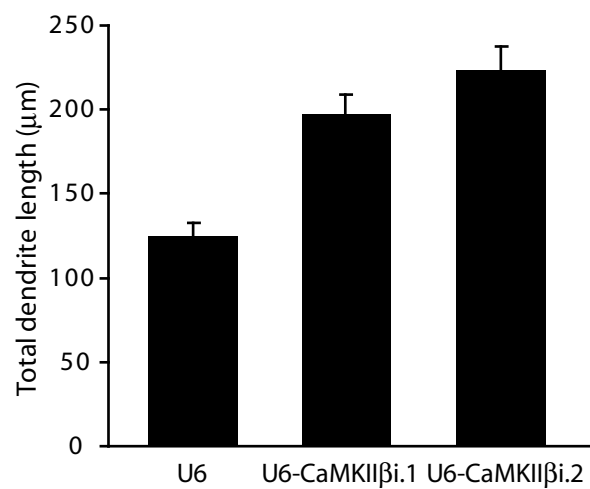**d**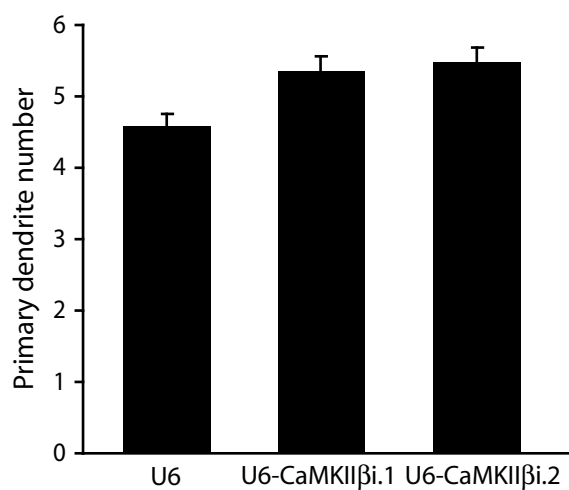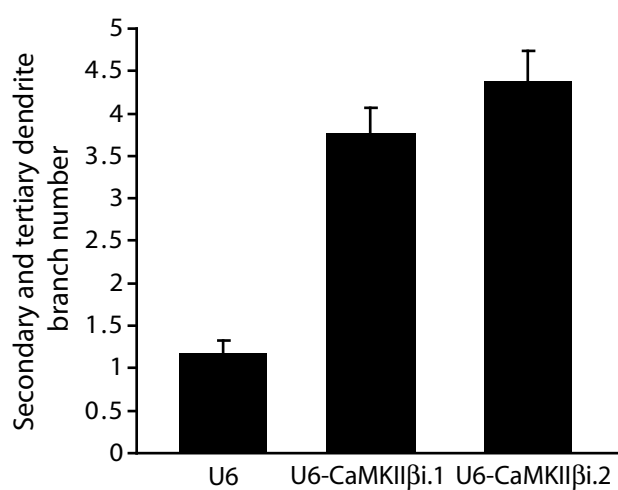**e**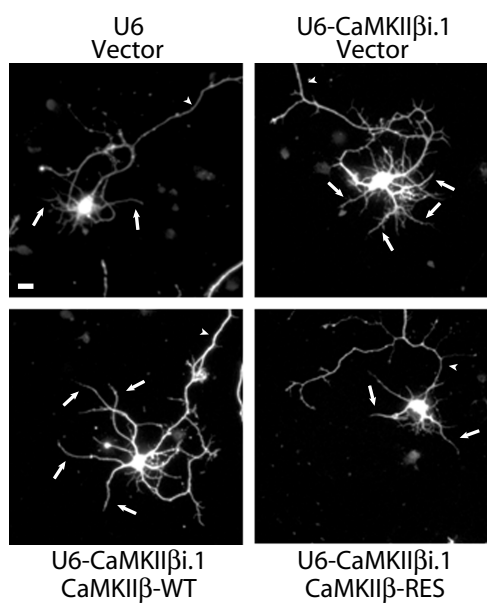**f**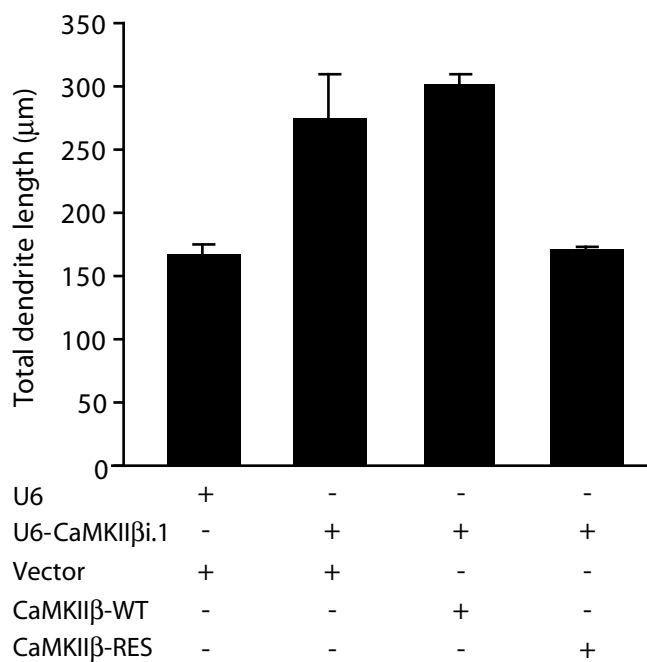

**Supplementary Figure 2. CaMKII $\beta$  restricts dendrite elaboration in hippocampal neurons.**

- a**, Lysates of primary E18 hippocampal neurons were immunoblotted with the CaMKII $\beta$  or Actin antibody.
- b**, E18 hippocampal neurons transfected with one of two different CaMKII $\beta$  RNAi plasmids (U6-CaMKII $\beta$ i) or the control U6 plasmid together with the GFP expression plasmid were analyzed as in Fig. 1d. CaMKII $\beta$  knockdown led to longer, more highly branched dendrites. Scale bar = 20  $\mu$ m.
- c**, Total dendrite length for E18 hippocampal neurons treated as in (b) was quantified. Dendrite length was significantly increased in CaMKII $\beta$  knockdown neurons compared to control U6-transfected neurons (ANOVA;  $p < 0.0001$ ). 204 neurons were measured.
- d**, Primary dendrite number and secondary and tertiary dendrite branch number for E18 hippocampal neurons treated as in (b) were quantified. Primary dendrite number was modestly increased in CaMKII $\beta$  knockdown neurons compared to control U6-transfected neurons (ANOVA,  $p < 0.005$ ). Secondary and tertiary dendrite branch number was significantly increased in CaMKII $\beta$  knockdown neurons compared to control U6-transfected neurons (ANOVA,  $p < 0.0001$ ). 204 neurons were analyzed.
- e**, E18 hippocampal neurons transfected with the CaMKII $\beta$  RNAi or control U6 plasmid together with the expression plasmid encoding CaMKII $\beta$ -WT, CaMKII $\beta$ -RES, or control vector and the GFP expression plasmid were analyzed as in (b). Expression of CaMKII $\beta$ -RES, but not CaMKII $\beta$ -WT, reduced hippocampal neuron dendrite growth and arborization compared to control vector in the background of CaMKII $\beta$  RNAi. Scale bar = 20  $\mu$ m.
- f**, Total dendrite length for E18 hippocampal neurons treated as in (e) was quantified. Expression of CaMKII $\beta$ -RES, but not CaMKII $\beta$ -WT, significantly reduced total dendrite length compared to control vector in the background of CaMKII $\beta$  RNAi (ANOVA;  $p < 0.005$ ). 240 neurons were measured.

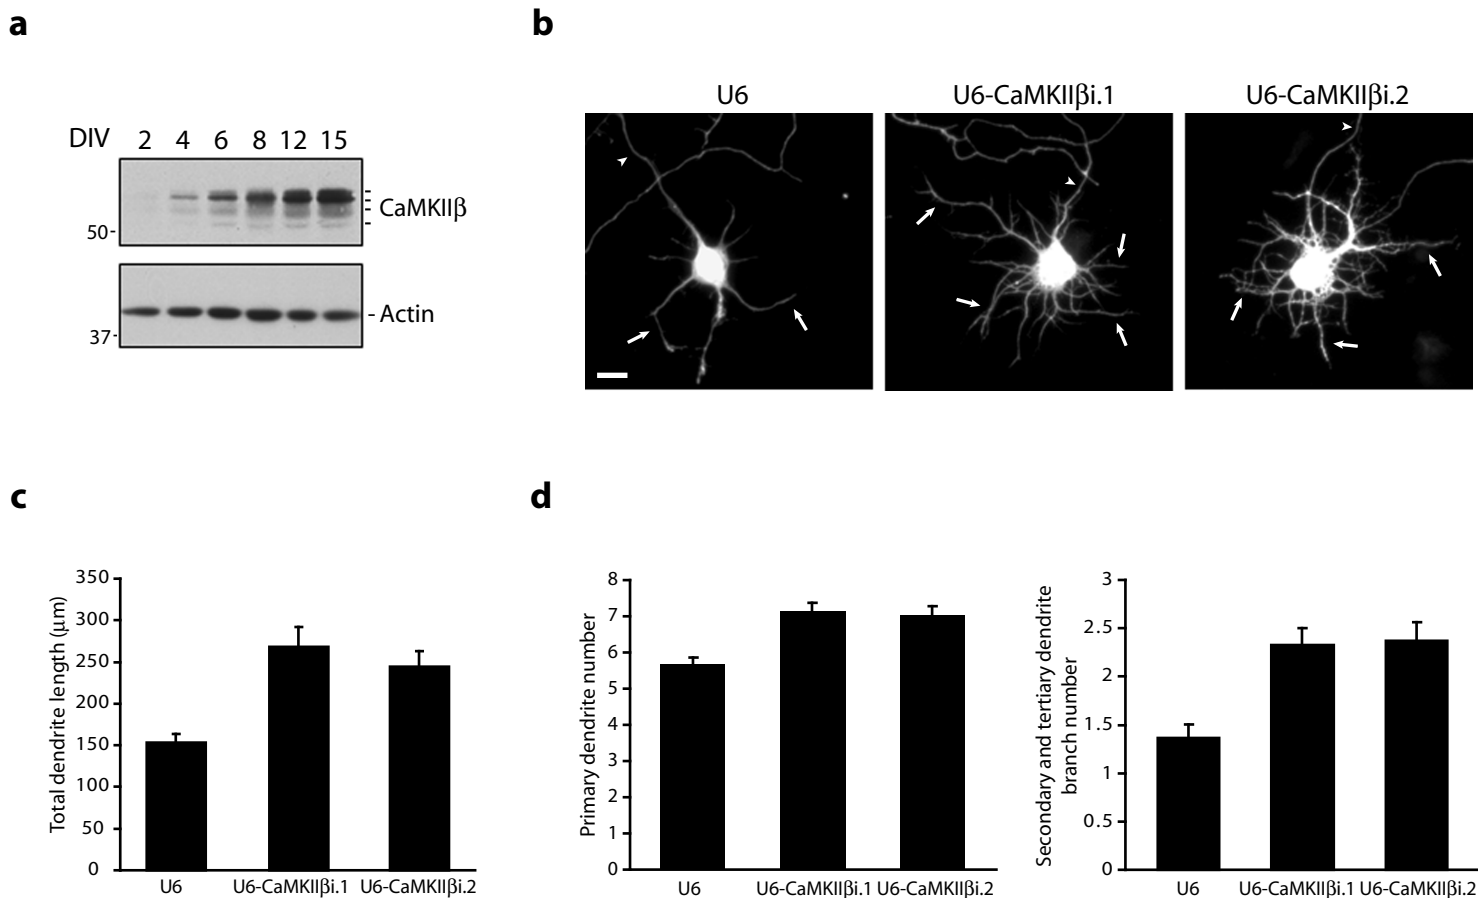

### Supplementary Figure 3. CaMKII $\beta$ restricts dendrite elaboration in cerebral cortical neurons.

**a**, Lysates of primary E18 cortical neurons were immunoblotted with the CaMKII $\beta$  or Actin antibody.

**b**, E18 cortical neurons transfected with one of two different CaMKII $\beta$  RNAi plasmids (U6-CaMKII $\beta$ i) or the control U6 plasmid together with the GFP expression plasmid were analyzed as in Fig. 1d. CaMKII $\beta$  knockdown led to longer, more highly branched dendrites. Scale bar = 20  $\mu$ m.

**c**, Total dendrite length for E18 cortical neurons treated as in (b) was quantified. Dendrite length was significantly increased in CaMKII $\beta$  knockdown neurons compared to control U6-transfected neurons (ANOVA;  $p < 0.05$ ). 270 neurons were measured.

**d**, Primary dendrite number and secondary and tertiary dendrite branch number for E18 cortical neurons treated as in (b) were quantified. Primary dendrite number was modestly increased in CaMKII $\beta$  knockdown neurons compared to control U6-transfected neurons (ANOVA,  $p < 0.001$ ). Secondary and tertiary dendrite branch number was significantly increased in CaMKII $\beta$  knockdown neurons compared to control U6-transfected neurons (ANOVA,  $p < 0.001$ ). 270 neurons were analyzed.

**a**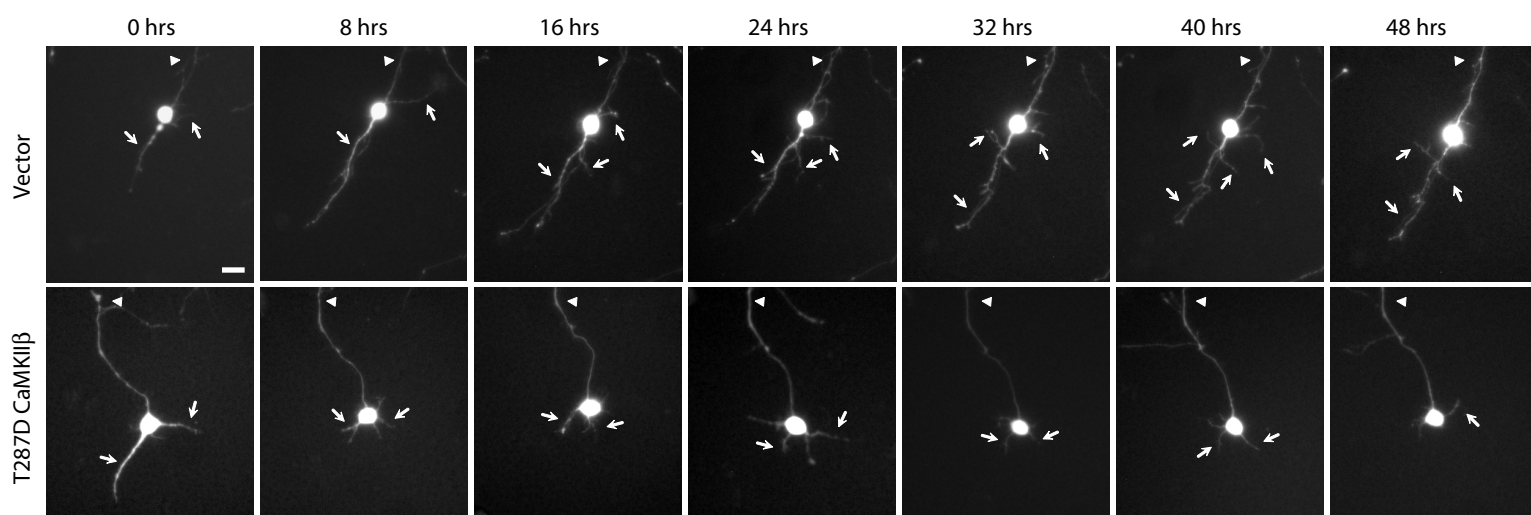**b**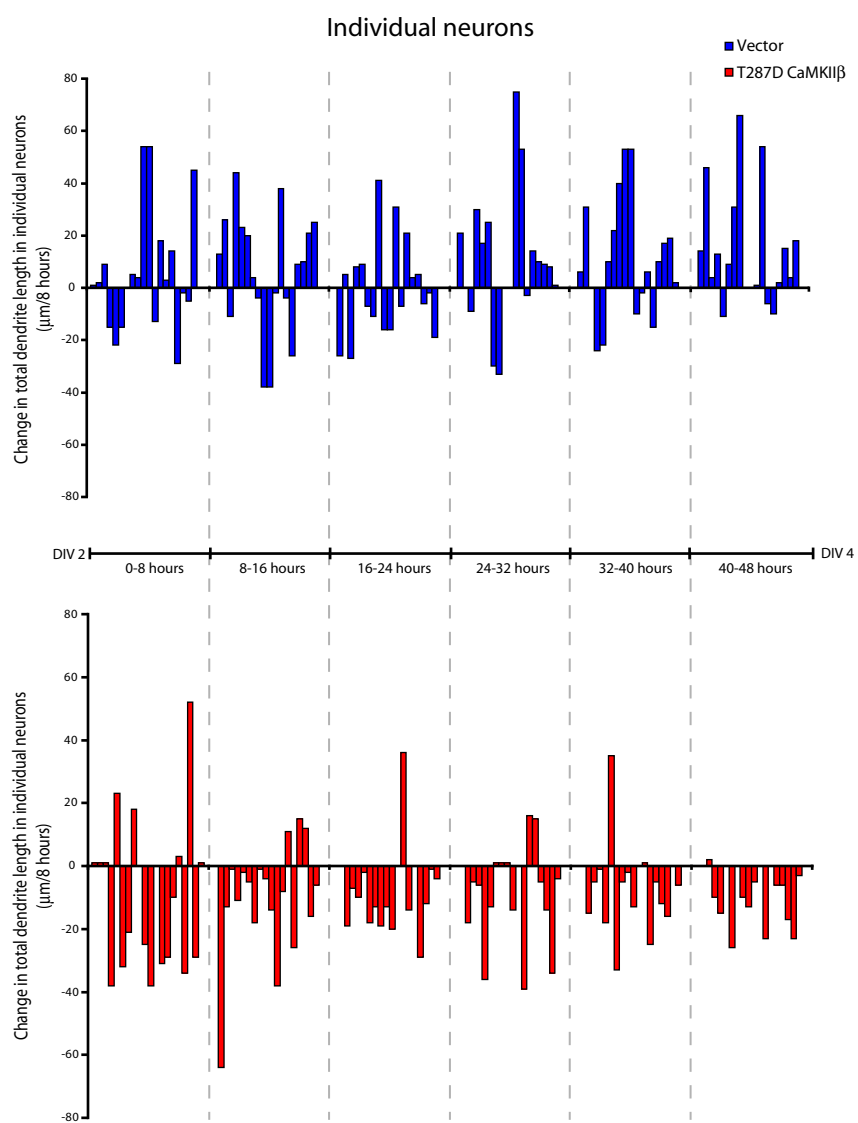**c**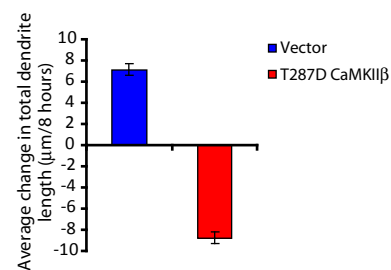**d**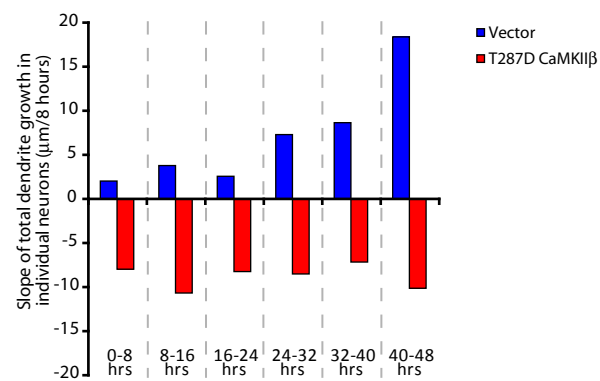**e**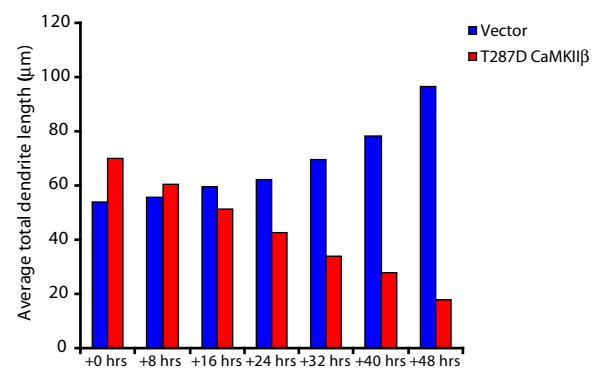

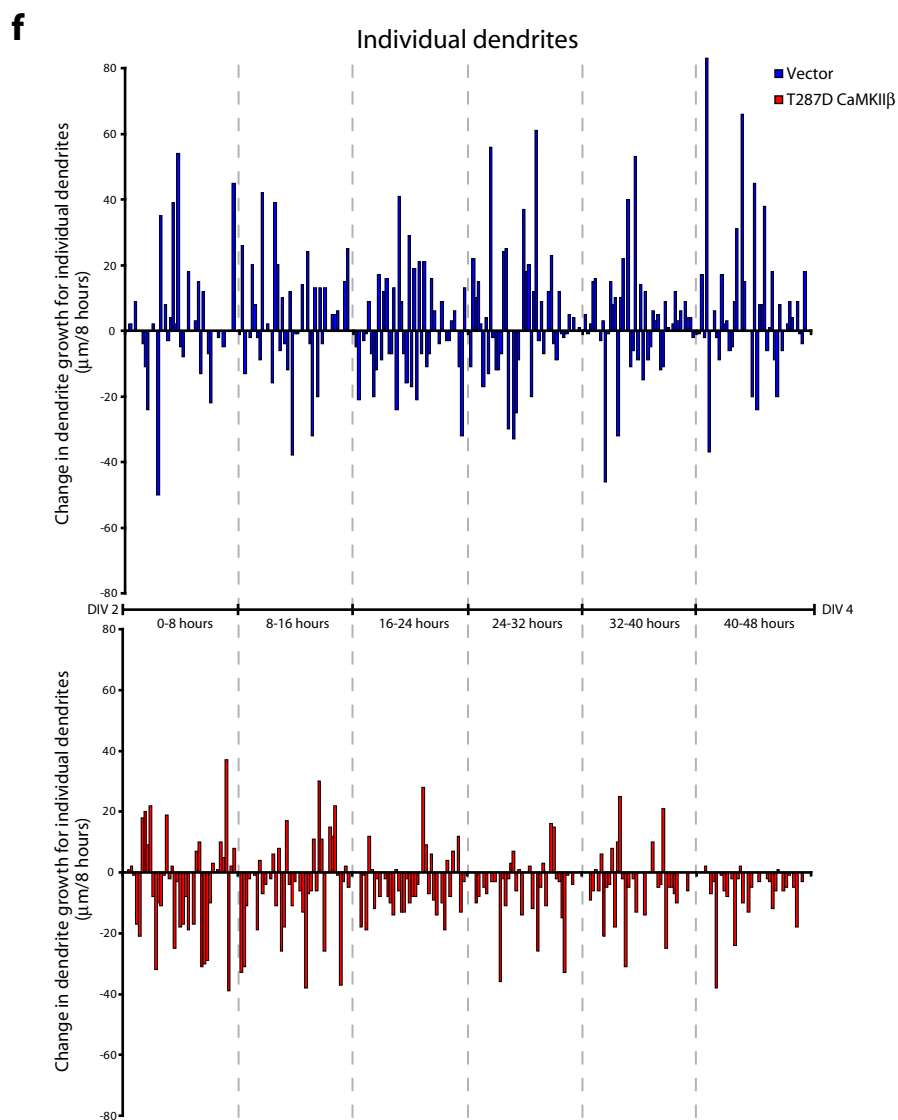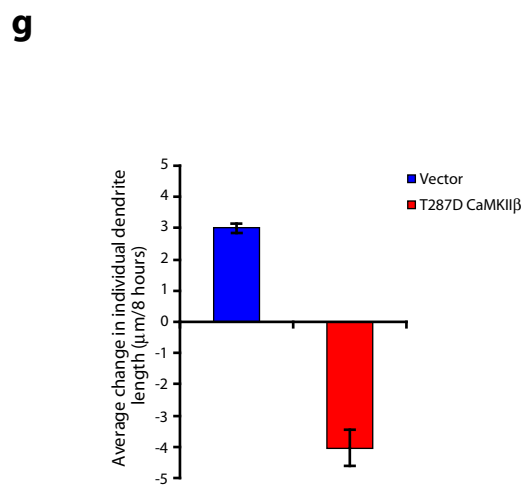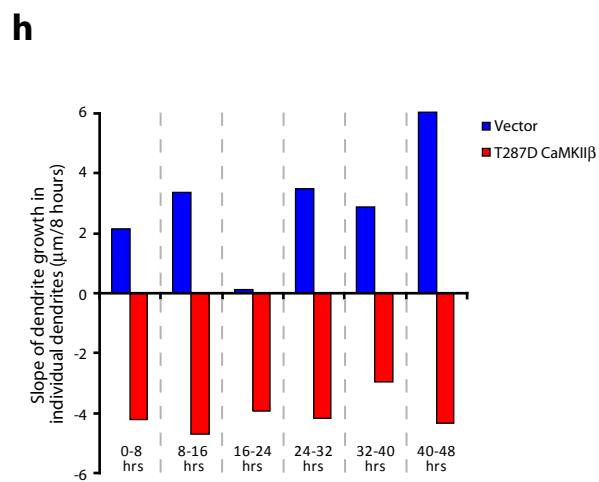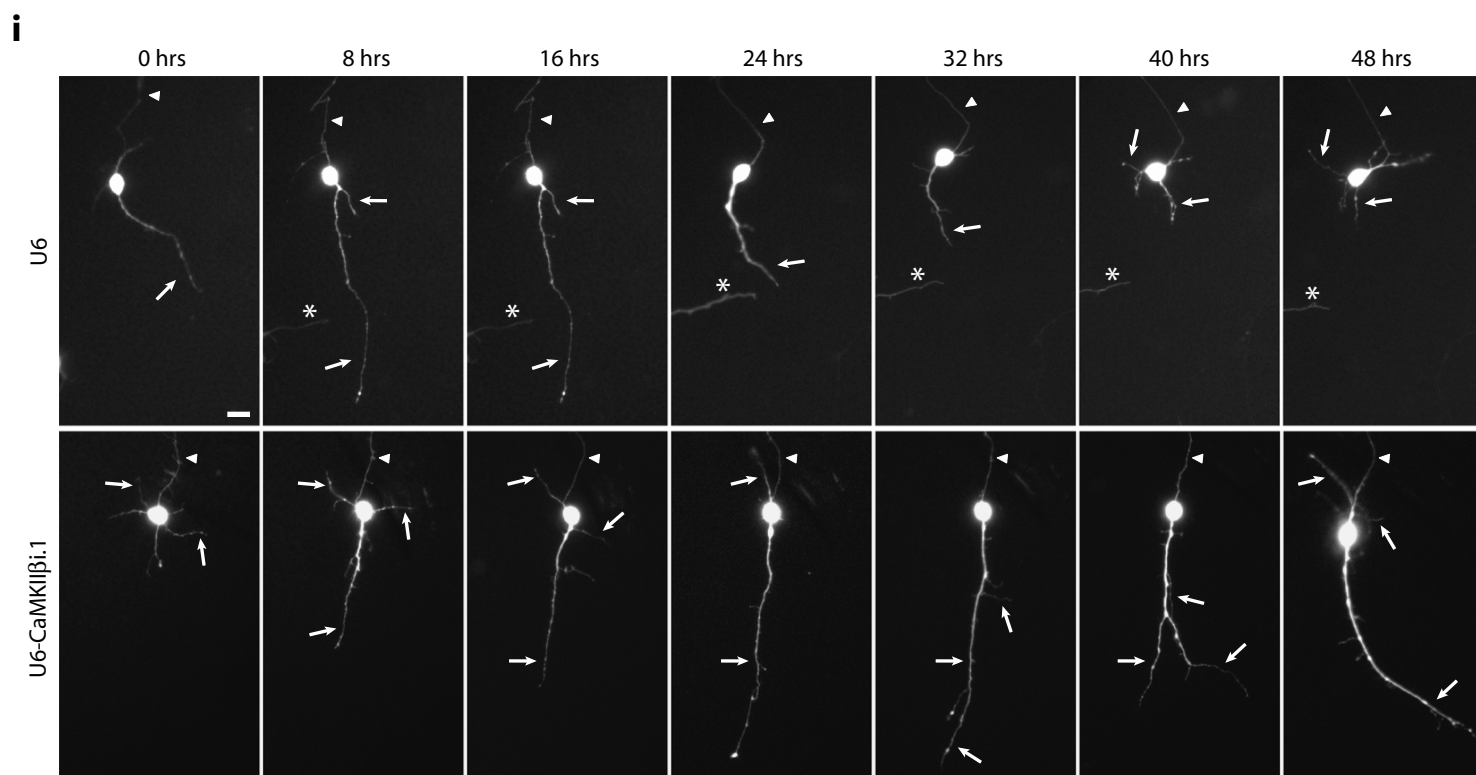

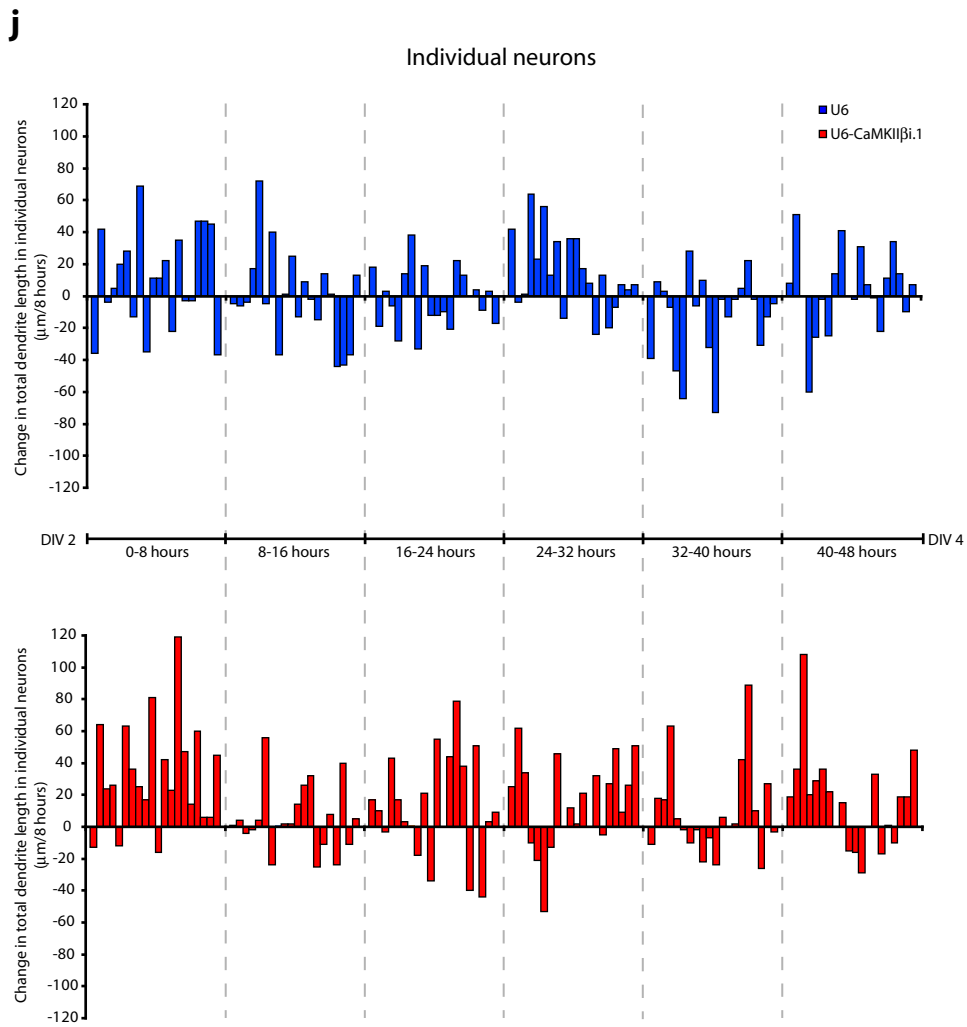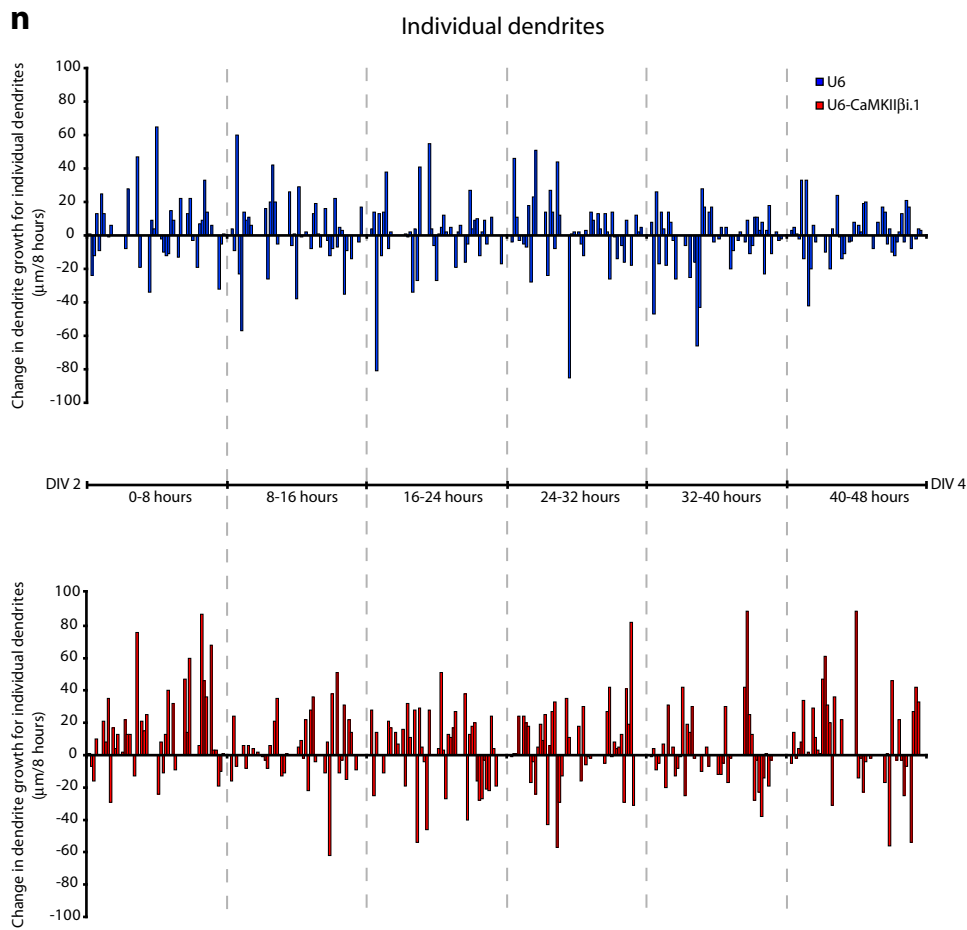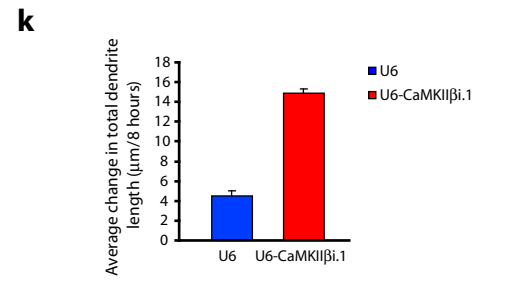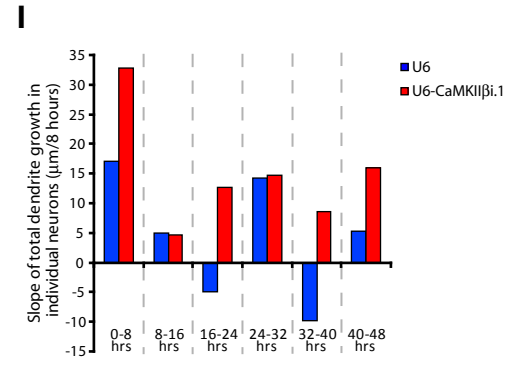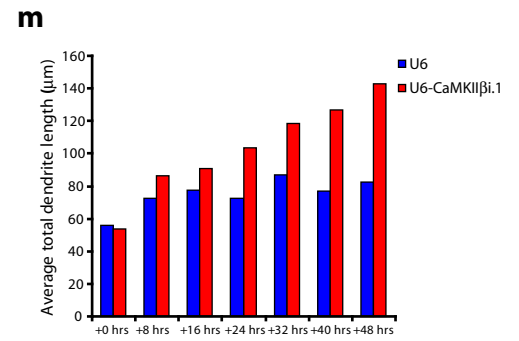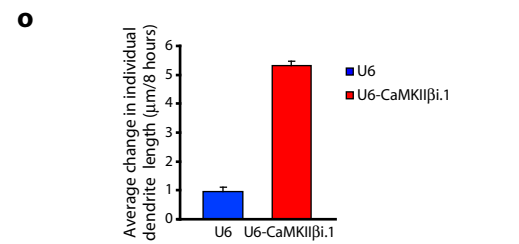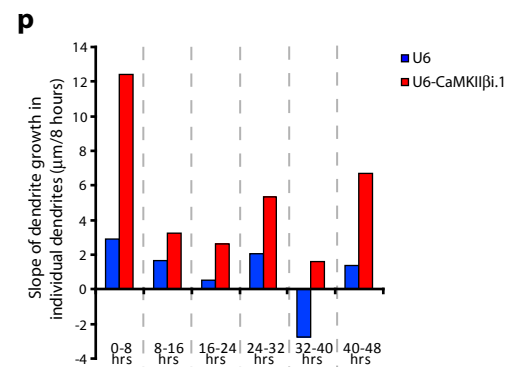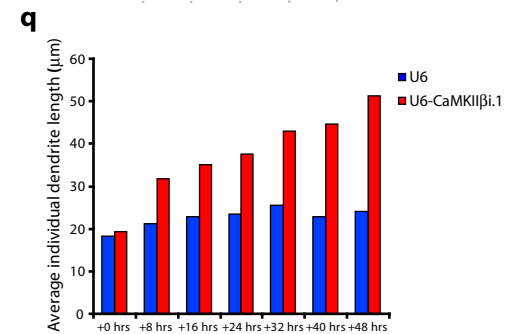

#### **Supplementary Figure 4. CaMKII $\beta$ stimulates retraction of dendrites in neurons.**

- a**, Granule neurons were transfected on DIV1 with the T287D CaMKII $\beta$  expression plasmid or control vector together with the GFP expression plasmid. Starting at DIV2, granule neuron dendrites were assessed by live fluorescent imaging every eight hrs over a 48 hr interval. Expression of T287D CaMKII $\beta$  inhibited dendrite growth and stimulated dendrite retraction compared to control vector-transfection. Scale bar = 10  $\mu$ m.
- b**, Change in total dendrite length during each eight hour interval for individual neurons analyzed as in (a) was quantified. T287D CaMKII $\beta$ -expressing neurons had fewer periods of growth and more active retraction of dendrites compared to control vector-transfected neurons.
- c**, Average change in total dendrite length for all neurons analyzed as in (b) was significantly lower in T287D CaMKII $\beta$ -expressing neurons compared to control vector-transfected neurons (t-test,  $p < 0.0001$ ). 40 neurons were measured.
- d**, Slope of total dendrite growth for all neurons analyzed as in (b) demonstrated a negative rate of growth in T287D CaMKII $\beta$ -expressing neurons, consistent with dendrite retraction, while control vector-transfected neurons had a positive growth rate over each eight hour interval.
- e**, Average total dendrite length for all neurons analyzed as in (b) at each timepoint consistently decreased in T287D CaMKII $\beta$ -expressing neurons as compared to control vector-transfected neurons, which displayed consistent growth over the identical period of 48 hrs.
- f**, Change in individual dendrite length (including secondary and tertiary dendrite branches) during each eight hour interval for neurons analyzed as in (a) was quantified. T287D CaMKII $\beta$ -expressing neurons had fewer periods of growth and more active retraction of individual dendrites compared to control vector-transfected neurons.
- g**, Average change in individual dendrite length for all individual dendrites analyzed as in (f) was significantly lower in T287D CaMKII $\beta$ -expressing neurons as compared to control vector-transfected neurons (t-test,  $p < 0.0001$ ). 80 individual dendrites were measured.
- h**, Slope of individual dendrite growth for all primary dendrites analyzed as in (f) demonstrated a negative rate of growth in T287D CaMKII $\beta$ -expressing neurons, consistent with dendrite retraction, while control vector-transfected neurons had a positive growth rate for individual dendrites over each eight hour interval.
- i**, Granule neurons were transfected on DIV0 with the CaMKII $\beta$  RNAi or control U6 plasmid together with the GFP expression plasmid and analyzed as in (a). Asterisk indicates process from another neuron. CaMKII $\beta$  knockdown led to increased dendrite growth and reduced dendrite retraction compared to control U6-transfection. Scale bar = 10  $\mu$ m.
- j**, Change in total dendrite length during each eight hour interval for individual neurons analyzed as in (i) was quantified. CaMKII $\beta$  knockdown neurons had more periods of growth and less active retraction of dendrites compared to control U6-transfection.
- k**, Average change in total dendrite length for all neurons analyzed as in (j) was significantly greater in CaMKII $\beta$  knockdown neurons as compared to control U6-transfected neurons (t-test,  $p < 0.01$ ). 40 neurons were measured.
- l**, Slope of total dendrite growth for all neurons analyzed as in (j) demonstrated a robustly positive rate of growth in CaMKII $\beta$  knockdown neurons, consistent with a role for endogenous CaMKII $\beta$  in dendrite retraction, while control U6-transfected neurons had a more limited rate of growth over each eight hour interval.
- m**, Average total dendrite length for all neurons analyzed as in (j) at each timepoint increased more substantially in CaMKII $\beta$  knockdown neurons compared to control U6-transfected neurons over the identical period of 48 hrs.
- n**, Change in individual dendrite length (including secondary and tertiary dendrite branches) during each eight hour interval was quantified for individual primary dendrites of neurons analyzed as in (i). Individual dendrites of CaMKII $\beta$  knockdown neurons had increased periods of growth and less active retraction compared to individual dendrites of control U6-transfected neurons.
- o**, Average change in individual dendrite length for all individual dendrites analyzed as in (n) was significantly greater in CaMKII $\beta$  knockdown neurons as compared to control U6-transfected neurons (t-test,  $p < 0.01$ ). 100 individual dendrites were measured.
- p**, Slope of individual dendrite growth for all primary dendrites analyzed as in (n) demonstrated a robustly positive rate of individual dendrite growth in CaMKII $\beta$  knockdown neurons, consistent with the role of endogenous CaMKII $\beta$  in dendrite retraction, while individual dendrites of control U6-transfected neurons had a more limited rate of growth over each eight hour interval.

**Supplementary Figure 4 (continued).**

**q,** Average individual dendrite length for all primary dendrites analyzed as in (n) at each timepoint increased more substantially in CaMKII $\beta$  knockdown neurons compared to control U6-transfected neurons over the identical period of 48 hrs.

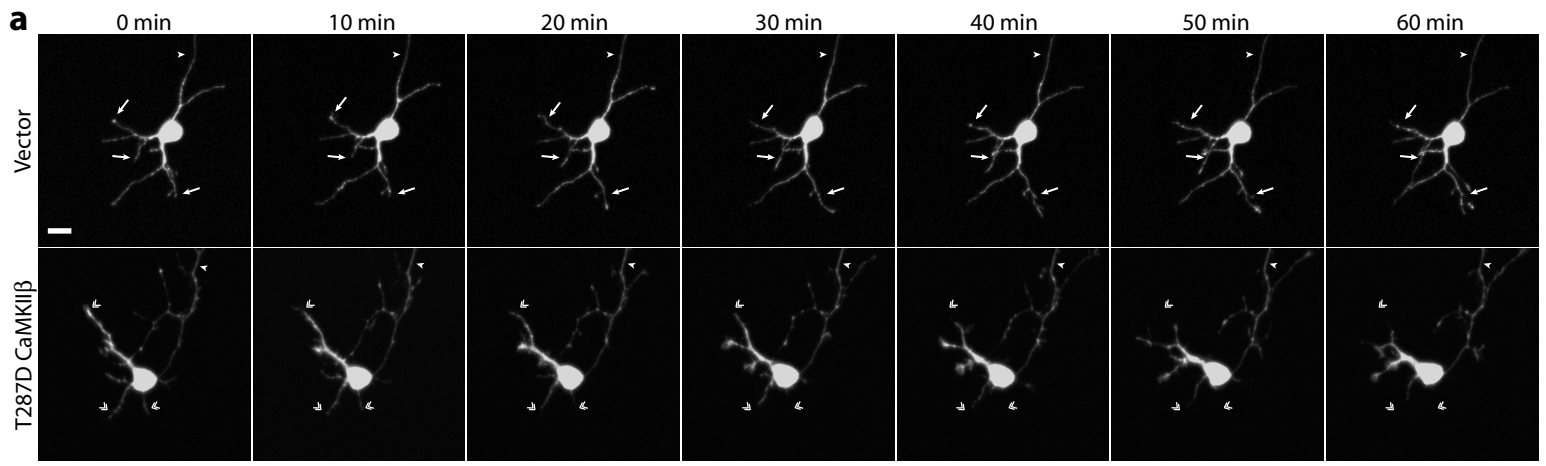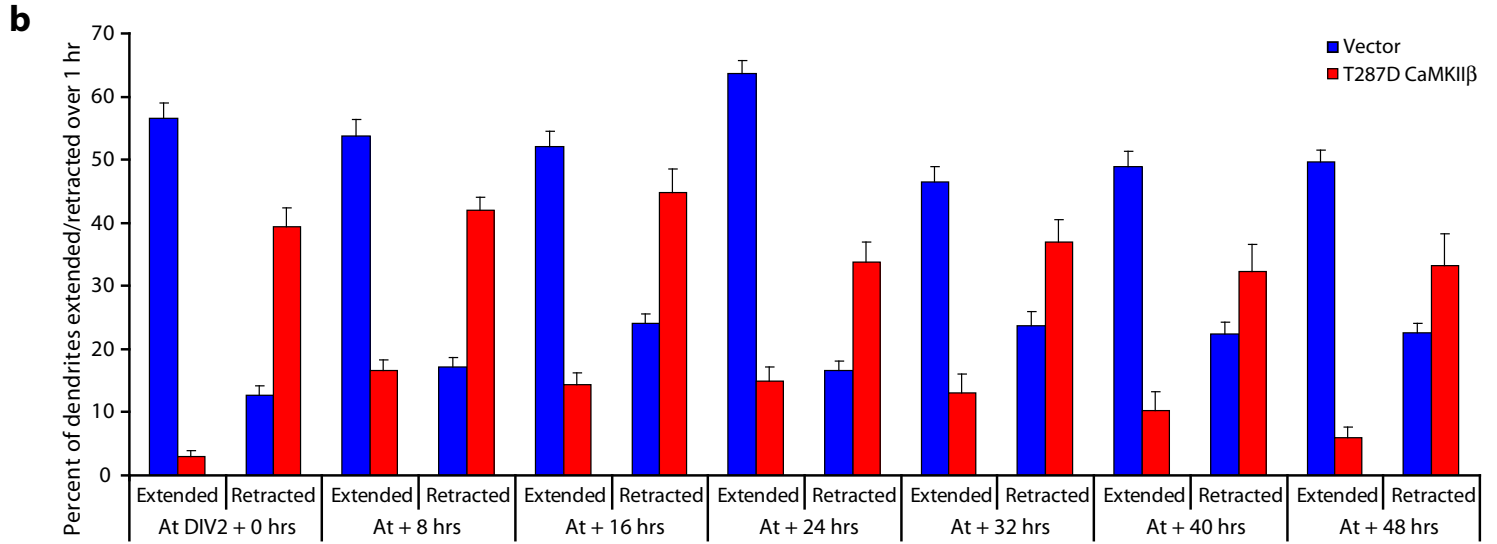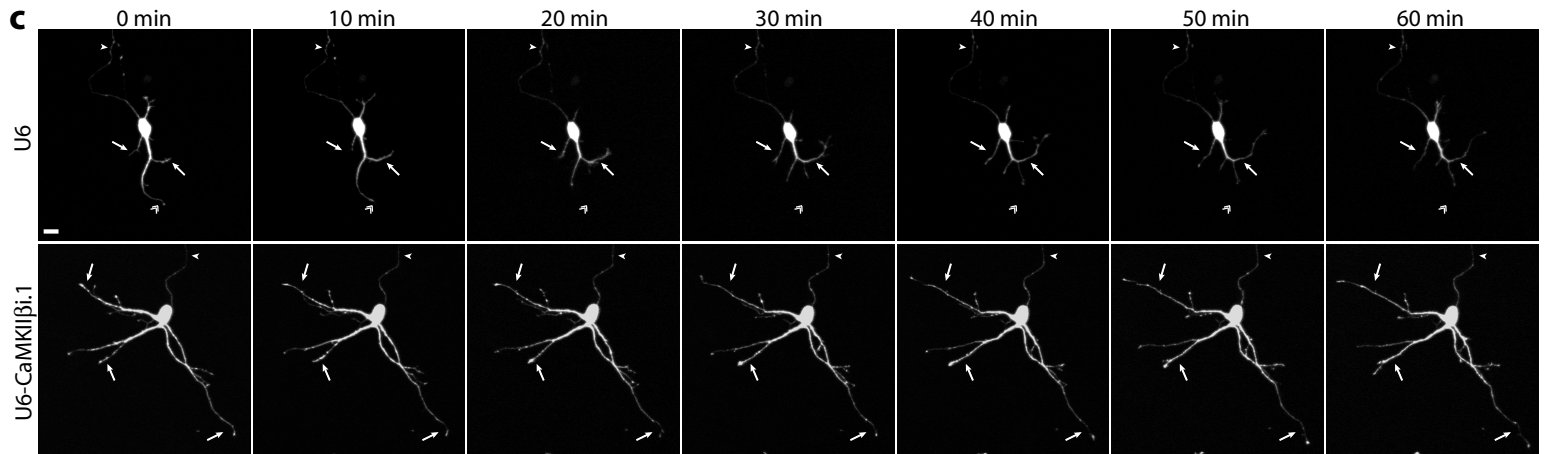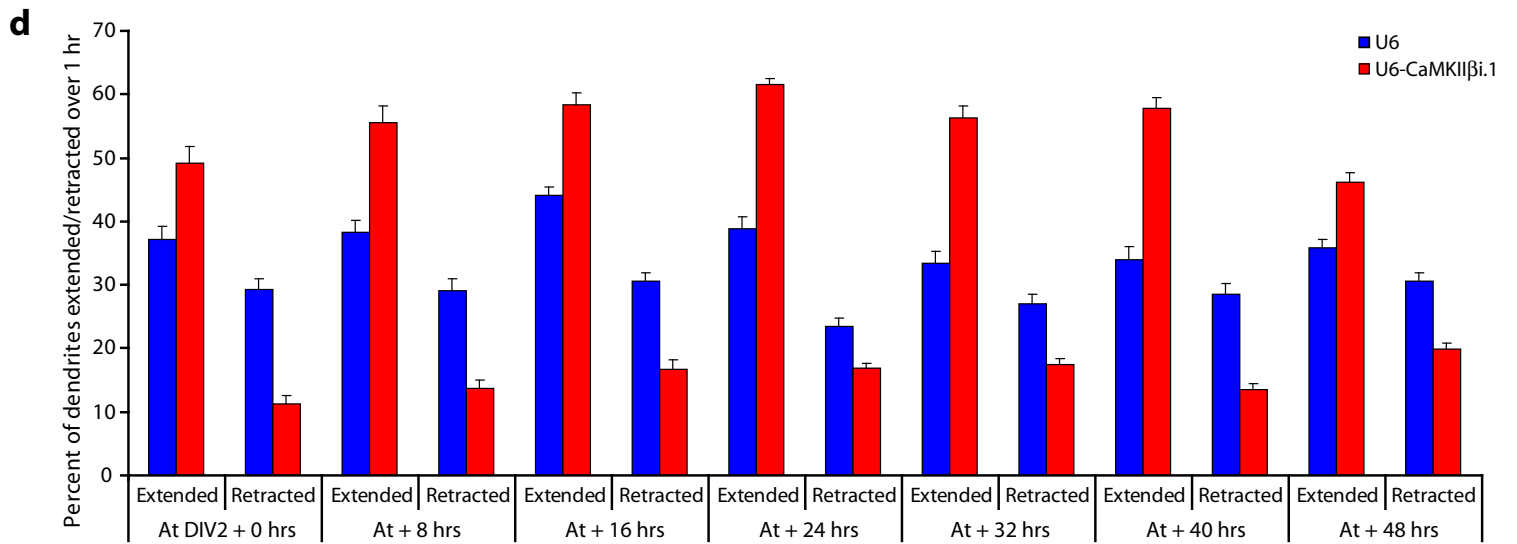

**Supplementary Figure 5. CaMKII $\beta$  regulates minute, dynamic changes in dendrite extension and retraction.**

**a,** Granule neurons were transfected on DIV1 with the T287D CaMKII $\beta$  expression plasmid or control vector together with the GFP expression plasmid. Starting at DIV2, granule neuron dendrites were assessed by live spinning disk confocal imaging every eight hours over a 48 hr interval in an environment-controlled chamber. At each time point, neurons were imaged every ten minutes for a one hour period. Representative neurons at DIV 2 + 24 hrs are shown. Arrows and chevrons indicate dendrite extension and retraction, respectively, and both are in a constant, fixed position across all images. Arrowheads indicate axons. Expression of T287D CaMKII $\beta$  reduced dendrite extension events and promoted dendrite retraction events compared to control vector-transfection. Scale bar = 10  $\mu$ m.

**b,** The percentage of dendrites that extended or retracted in length greater than 2  $\mu$ m over each one hour period of analysis for neurons analyzed as in (a) was quantified. T287D CaMKII $\beta$ -expressing neurons had a significant reduction in the percentage of dendrite extension events with a significant increase in the percentage of dendrite retraction events compared to control vector-transfected neurons at each timepoint analyzed (ANOVA,  $p < 0.0001$ ). 46 neurons were analyzed.

**c,** Granule neurons were transfected on DIV0 with the CaMKII $\beta$  RNAi or control U6 plasmid together with the GFP expression plasmid and analyzed as in (a). Representative neurons at DIV 2 + 24 hrs are shown. Arrows and chevrons indicate dendrite extension and retraction, respectively, and both are in a constant, fixed position across all images. Arrowheads indicate axons. CaMKII $\beta$  knockdown promoted dendrite extension events and reduced dendrite retraction events compared to control U6-transfection. Scale bar = 10  $\mu$ m.

**d,** The percentage of dendrites that extended or retracted in length greater than 2  $\mu$ m over each one hour period of analysis for neurons analyzed as in (c) was quantified. CaMKII $\beta$  knockdown neurons had a significant increase in the percentage of dendrite extension events with a significant reduction in the percentage of dendrite retraction events compared to control U6-transfected neurons (ANOVA,  $p < 0.0001$ ). 50 neurons were analyzed.

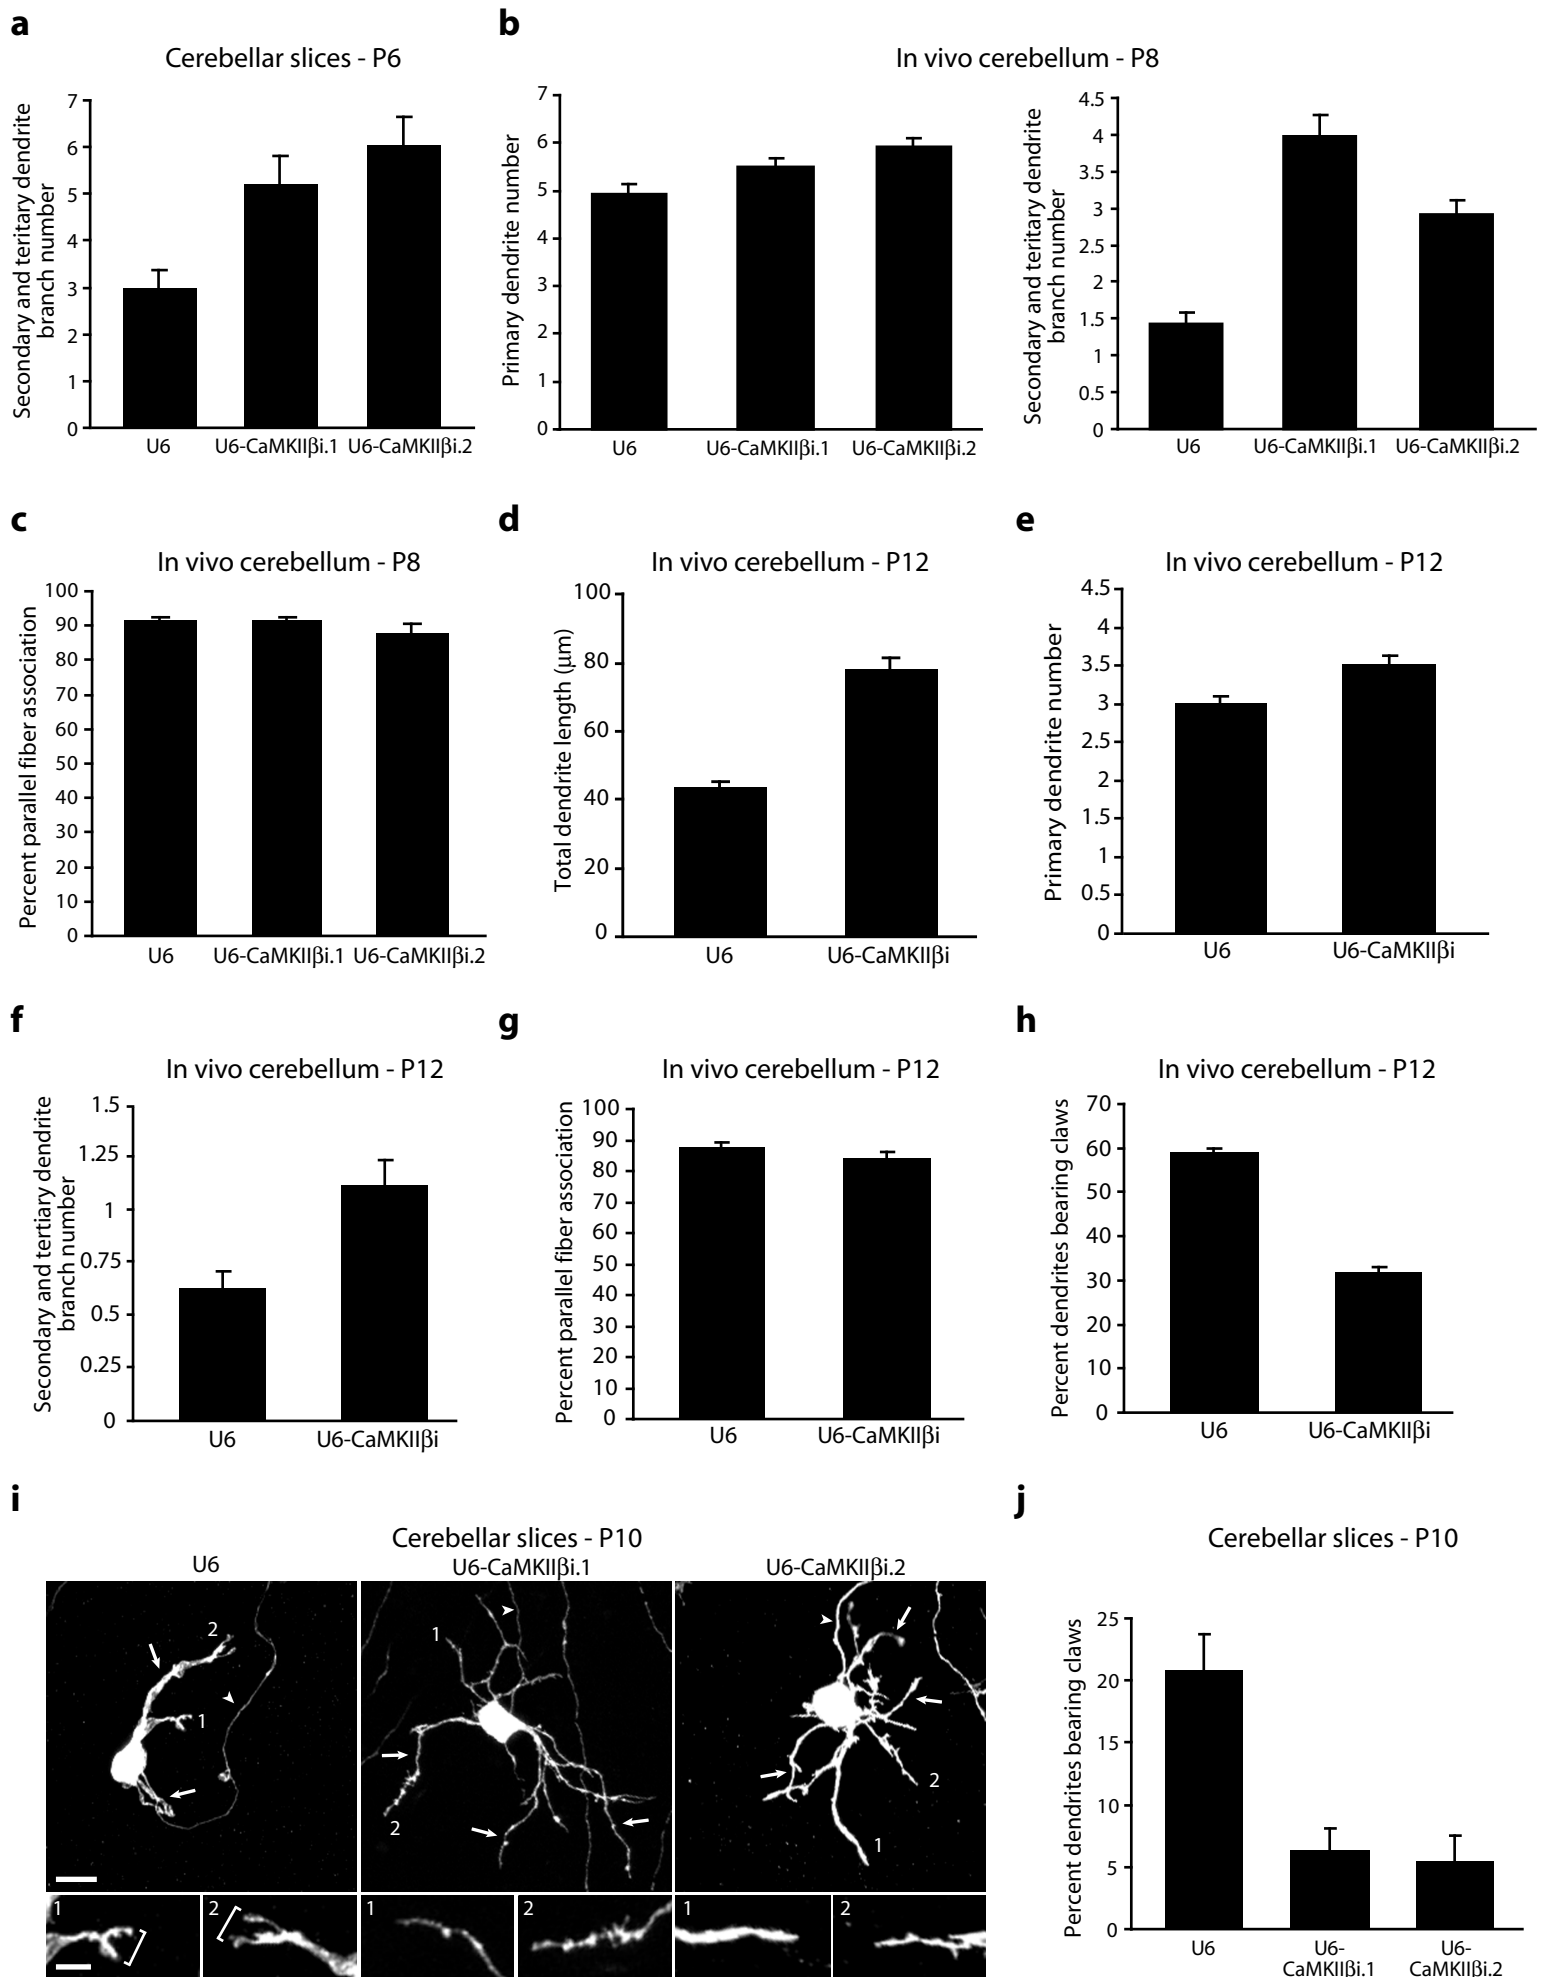

### **Supplementary Figure 6. CaMKII $\beta$ controls the patterning of dendrite arbors.**

**a**, Secondary and tertiary dendrite branch number for IGL granule neurons in cerebellar slices analyzed as in Fig. 2a was quantified. CaMKII $\beta$  knockdown in cerebellar slices significantly increased the number of secondary and tertiary dendrite branches in IGL granule neurons (ANOVA,  $p < 0.0005$ ). 199 neurons were analyzed.

**b**, Rat pups electroporated in vivo with a U6-CaMKII $\beta$ i/CMV-GFP RNAi or control U6/CMV-GFP plasmid were sacrificed at P8 and analyzed as in Fig. 2d. Morphometric analyses revealed that primary dendrite number was modestly increased, and secondary and tertiary dendrite branch number were significantly increased in IGL granule neurons in CaMKII $\beta$  knockdown animals compared to control U6 animals (ANOVA,  $p < 0.005$ ). 275 neurons were analyzed.

**c**, Granule neurons analyzed as in (b) were counted in the IGL and axons were counted in the molecular layer. 270 neurons were analyzed.

**d**, Rat pups electroporated in vivo with a U6-CaMKII $\beta$ i/CMV-GFP RNAi or control U6/CMV-GFP plasmid were sacrificed at P12 and analyzed as in (b). Morphometric analyses revealed that total dendrite length was significantly increased in IGL granule neurons in CaMKII $\beta$  knockdown animals compared to control U6 animals (t-test,  $p < 0.0001$ ). 240 neurons were measured.

**e**, IGL granule neurons analyzed as in (d) were subjected to morphometric analyses. Primary dendrite number was modestly increased in IGL neurons in CaMKII $\beta$  knockdown animals compared to control U6 animals (t-test,  $p < 0.005$ ). 240 neurons were analyzed.

**f**, IGL granule neurons analyzed as in (d) were subjected to morphometric analysis. Secondary and tertiary dendrite branch number was significantly increased in IGL granule neurons in CaMKII $\beta$  knockdown animals compared to control U6 animals (t-test,  $p < 0.005$ ). 240 neurons were analyzed.

**g**, Granule neurons analyzed as in (d) were counted in the IGL and axons were counted in the molecular layer as described<sup>1-2</sup>. 542 neurons were analyzed.

**h**, IGL granule neurons analyzed as in (b) were subjected to morphometric analysis. The percentage of dendrites bearing claws was significantly decreased in IGL granule neurons in CaMKII $\beta$  knockdown animals compared to control U6 animals (t-test,  $p < 0.0001$ ). 240 neurons were analyzed.

**i**, P10 rat cerebellar slices transfected by a biolistics method with the CaMKII $\beta$  RNAi or control U6 plasmid together with the GFP expression plasmid were analyzed as in (a). Representative granule neurons are shown. Scale bar = 10  $\mu$ m. Inset: Zoomed view of dendritic tips of individual neurons. Scale bar = 5  $\mu$ m. Bracket identifies dendritic claws. CaMKII $\beta$  knockdown in cerebellar slices led to longer, more highly branched dendrites with fewer dendritic claws in IGL granule neurons.

**j**, The percentage of dendrites bearing claws for IGL granule neurons in P10 cerebellar slices analyzed as in (i) was quantified. CaMKII $\beta$  knockdown in cerebellar slices significantly reduced the percentage of dendrites bearing claws in IGL granule neurons (ANOVA,  $p < 0.0001$ ). 105 neurons were analyzed.

**a**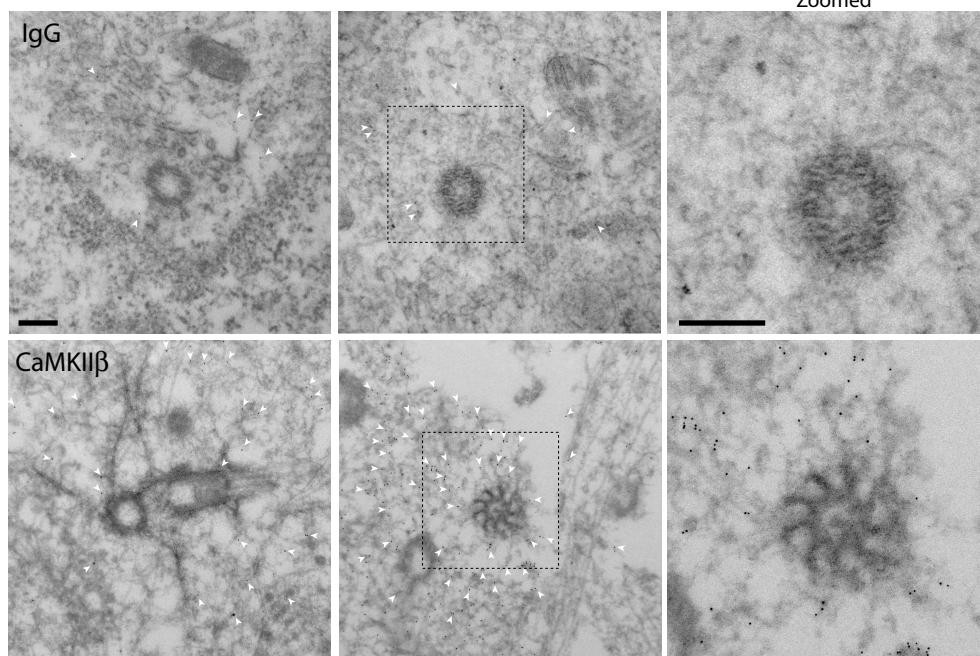**b**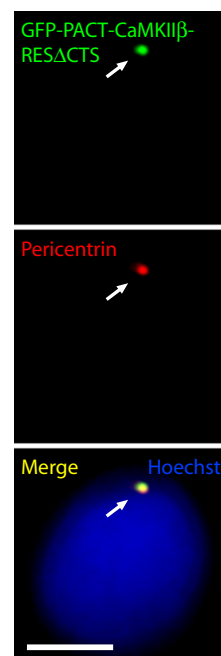**c**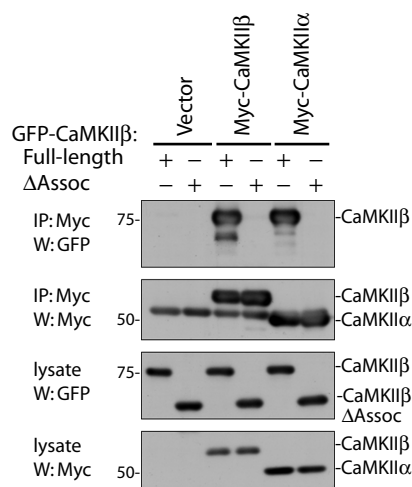**d**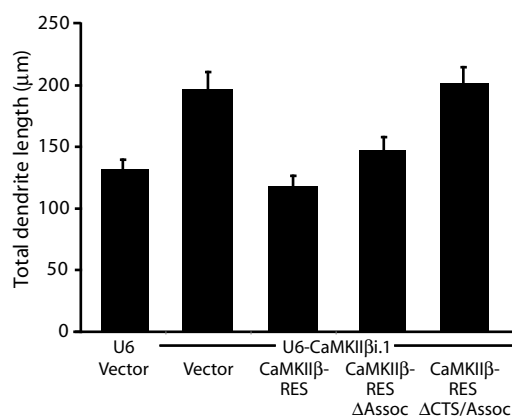**e**

Cerebellar slices

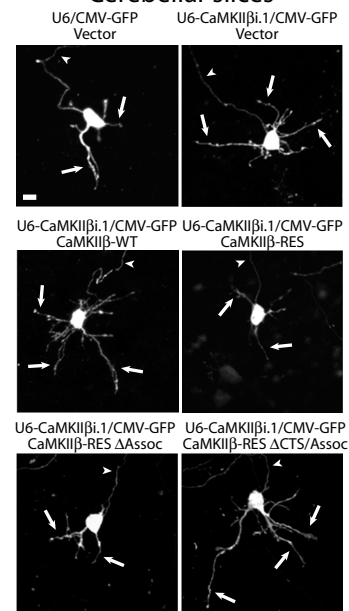**f**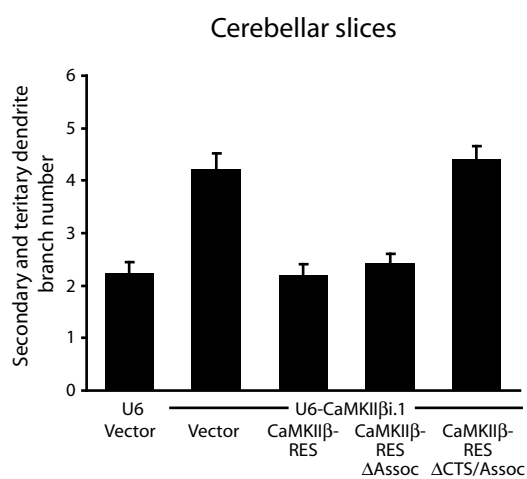**g**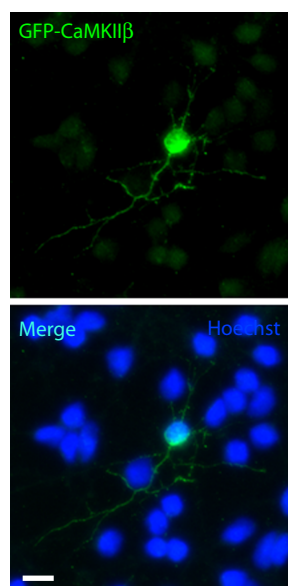**h**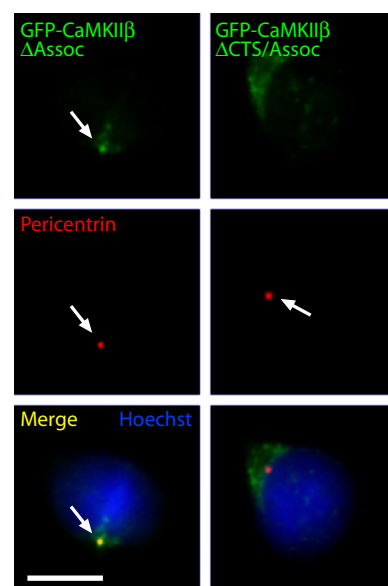

**Supplementary Figure 7. CaMKII $\beta$  controls dendrite morphogenesis independently of CaMKII $\alpha$ .**

**a**, Granule neurons were subjected to immunocytochemistry using the CaMKII $\beta$  or control (IgG) antibody and 5 nm gold labeling for analysis by electron microscopy. Neurons immunostained with control antibody had few gold particles near the centrosome, while CaMKII $\beta$  staining revealed numerous gold particles in the pericentriolar region (indicated by white arrowheads; also see zoomed image). Scale bar = 100 nm.

**b**, Granule neurons transfected with the GFP-PACT-CaMKII $\beta$ -RES $\Delta$ CTS expression plasmid were analyzed as in Fig. 3d. Arrows indicate co-localization of GFP-PACT-CaMKII $\beta$ -RES $\Delta$ CTS with the centrosomal marker pericentrin. Scale bar = 5  $\mu$ m.

**c**, Lysates of 293T cells transfected with the GFP-CaMKII $\beta$  or GFP-CaMKII $\beta$  $\Delta$ Assoc expression plasmid together with the Myc-CaMKII $\beta$  or Myc-CaMKII $\alpha$  expression plasmid or control vector were immunoprecipitated using the Myc antibody and immunoblotted with the GFP or Myc antibody.

**d**, Granule neurons transfected with the CaMKII $\beta$  RNAi or control U6 plasmid together with the expression plasmid encoding CaMKII $\beta$ -RES, CaMKII $\beta$ -RES $\Delta$ Assoc, CaMKII $\beta$ -RES $\Delta$ CTS/Assoc, or control vector and the GFP expression plasmid were analyzed as in Fig. 1d. Expression of CaMKII $\beta$ -RES and CaMKII $\beta$ -RES $\Delta$ Assoc, but not CaMKII $\beta$ -RES $\Delta$ CTS/Assoc, significantly reduced total dendrite length compared to control vector in the background of CaMKII $\beta$  RNAi (ANOVA;  $p < 0.0001$ ). 450 neurons were measured.

**e**, Rat cerebellar slices biolistically transfected with the U6-CaMKII $\beta$ i/CMV-GFP RNAi or control U6/CMV-GFP plasmid together with the expression plasmid encoding CaMKII $\beta$ -RES, CaMKII $\beta$ -RES $\Delta$ Assoc, CaMKII $\beta$ -RES $\Delta$ CTS/Assoc, or control vector were analyzed as in Fig. 2a. Representative granule neurons are shown. CaMKII $\beta$ -RES and CaMKII $\beta$ -RES $\Delta$ Assoc, but not CaMKII $\beta$ -WT or CaMKII $\beta$ -RES $\Delta$ Assoc/CTS, increased dendrite retraction compared to control vector in the background of CaMKII $\beta$  RNAi. Scale bar = 10  $\mu$ m.

**f**, Cerebellar slices were analyzed as in (e) and subjected to morphometric analysis. CaMKII $\beta$ -RES and CaMKII $\beta$ -RES $\Delta$ Assoc, but not CaMKII $\beta$ -RES $\Delta$ CTS/Assoc, significantly reduced secondary and tertiary dendrite branch number compared to control vector in the background of CaMKII $\beta$  RNAi (ANOVA;  $p < 0.0001$ ). 479 neurons were analyzed.

**g**, Granule neurons transfected with the GFP-CaMKII $\beta$  expression plasmid were subjected to immunocytochemistry using the GFP antibody. GFP-CaMKII $\beta$  localized throughout the soma and processes. Scale bar = 10  $\mu$ m.

**h**, Granule neurons transfected with the GFP-CaMKII $\beta$  $\Delta$ Assoc or GFP-CaMKII $\beta$  $\Delta$ CTS/Assoc expression plasmid were analyzed as in (b). Arrows identify the centrosome based on pericentrin immunofluorescence. GFP-CaMKII $\beta$  $\Delta$ Assoc but not GFP-CaMKII $\beta$  $\Delta$ CTS/Assoc was enriched at the centrosome. Scale bar = 5  $\mu$ m.

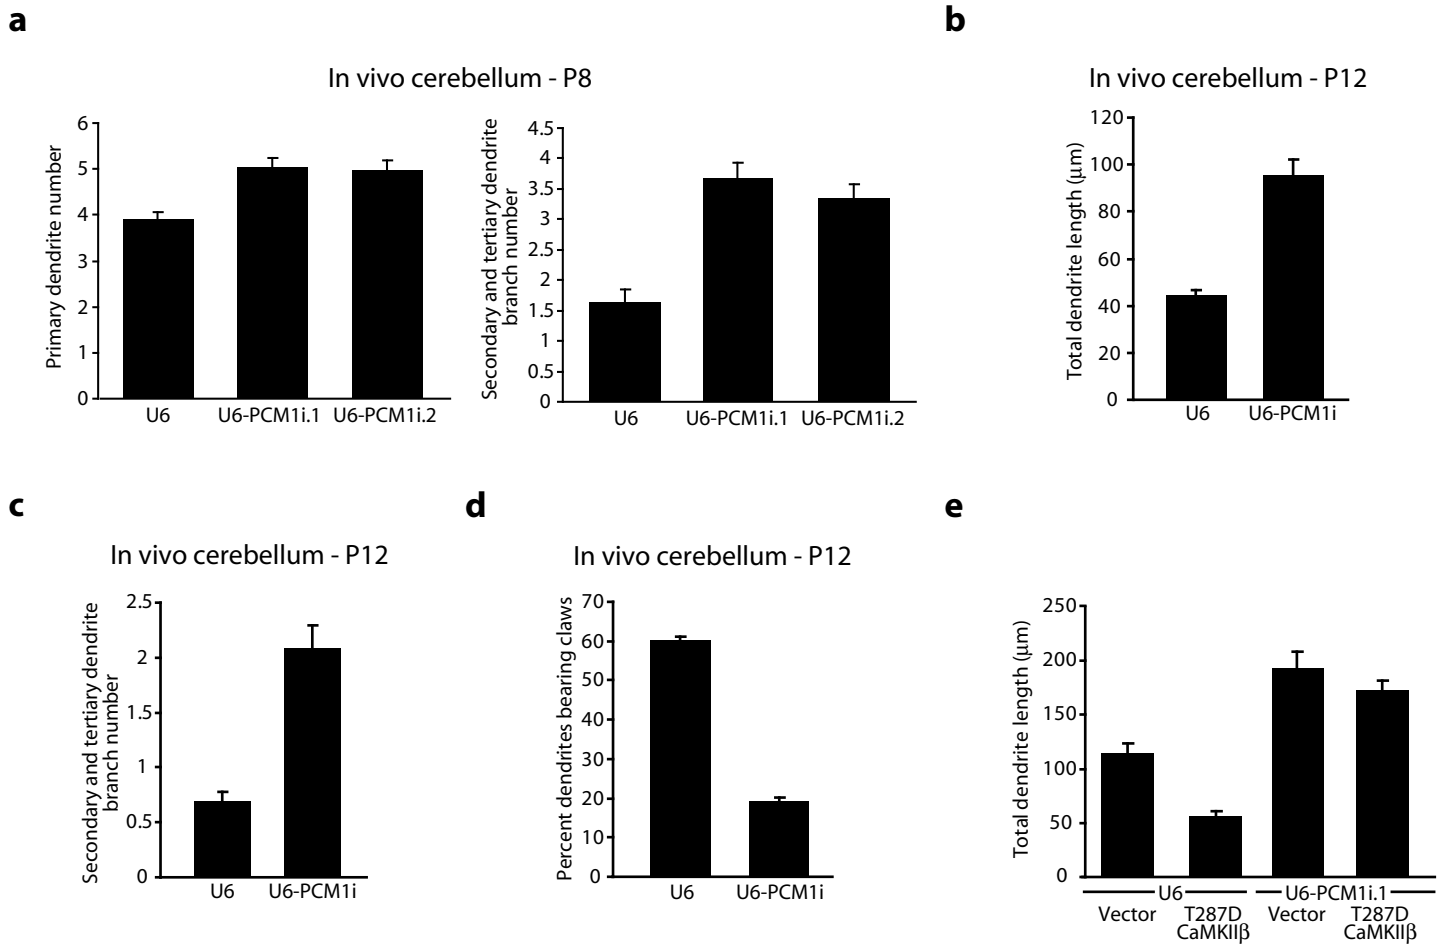

### Supplementary Figure 8. PCM1 regulates dendrite morphogenesis in vivo.

**a**, Rat pups electroporated in vivo with a U6-PCM1i/CMV-GFP RNAi or control U6/CMV-GFP plasmid were sacrificed at P8 and analyzed as in Fig. 2d. Morphometric analysis revealed that primary dendrite number was modestly increased (ANOVA,  $p < 0.05$ ), and secondary and tertiary dendrite branch number was significantly increased in IGL granule neurons in PCM1 knockdown animals compared to control U6 animals (ANOVA,  $p < 0.0001$ ). 239 neurons were analyzed.

**b**, Rat pups electroporated in vivo with a U6-PCM1i/CMV-GFP RNAi or control U6/CMV-GFP plasmid were sacrificed at P12 and analyzed as in (a). Morphometric analysis revealed that total dendrite length was significantly increased in IGL granule neurons in PCM1 knockdown animals compared to control U6 animals (t-test,  $p < 0.0001$ ). 150 neurons were measured.

**c**, IGL granule neurons analyzed as in (b) were subjected to morphometric analysis. Secondary and tertiary dendrite branch number was significantly increased in IGL granule neurons in PCM1 knockdown animals compared to control U6 animals (t-test,  $p < 0.0001$ ). 150 neurons were analyzed.

**d**, IGL granule neurons analyzed as in (b) were subjected to morphometric analysis. The percentage of dendrites bearing claws was significantly decreased in IGL granule neurons in PCM1 knockdown animals compared to control U6 animals (t-test,  $p < 0.0001$ ). 150 neurons were analyzed.

**e**, Granule neurons transfected with the T287D CaMKIIβ expression plasmid or control vector together with PCM1 RNAi or control U6 plasmid and the GFP expression plasmid were analyzed as in Fig. 1d. Expression of T287D CaMKIIβ significantly reduced total dendrite length compared to control. PCM1 RNAi significantly increased total dendrite length in neurons in the presence or absence of T287D CaMKIIβ expression (ANOVA,  $p < 0.0001$ ). 236 neurons were measured.

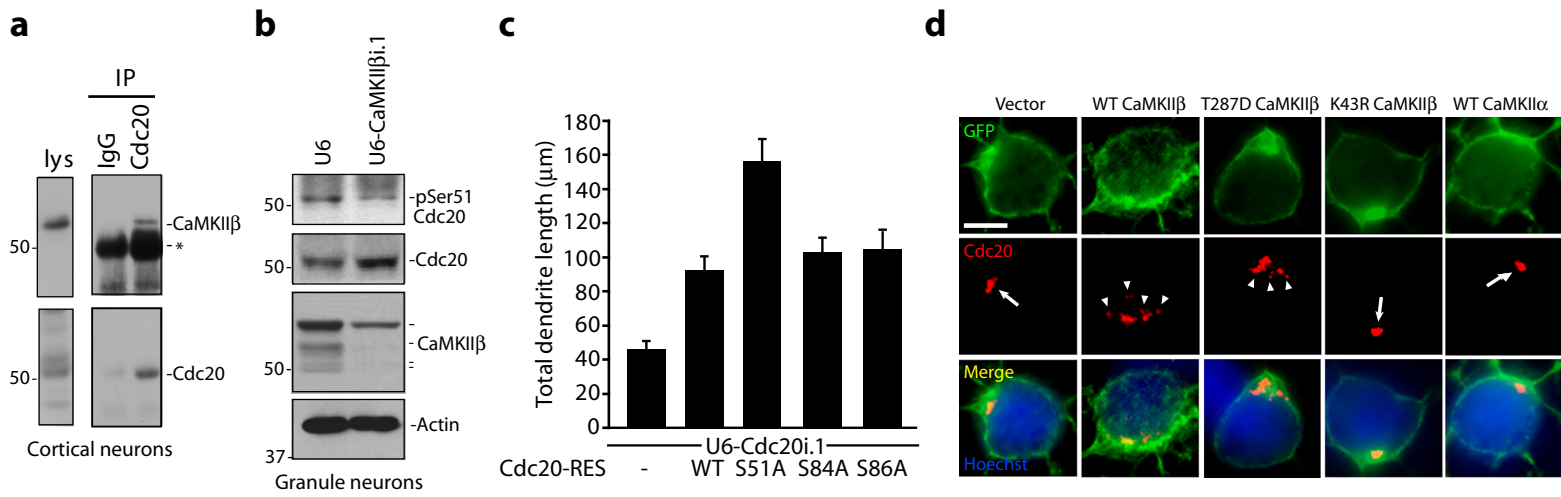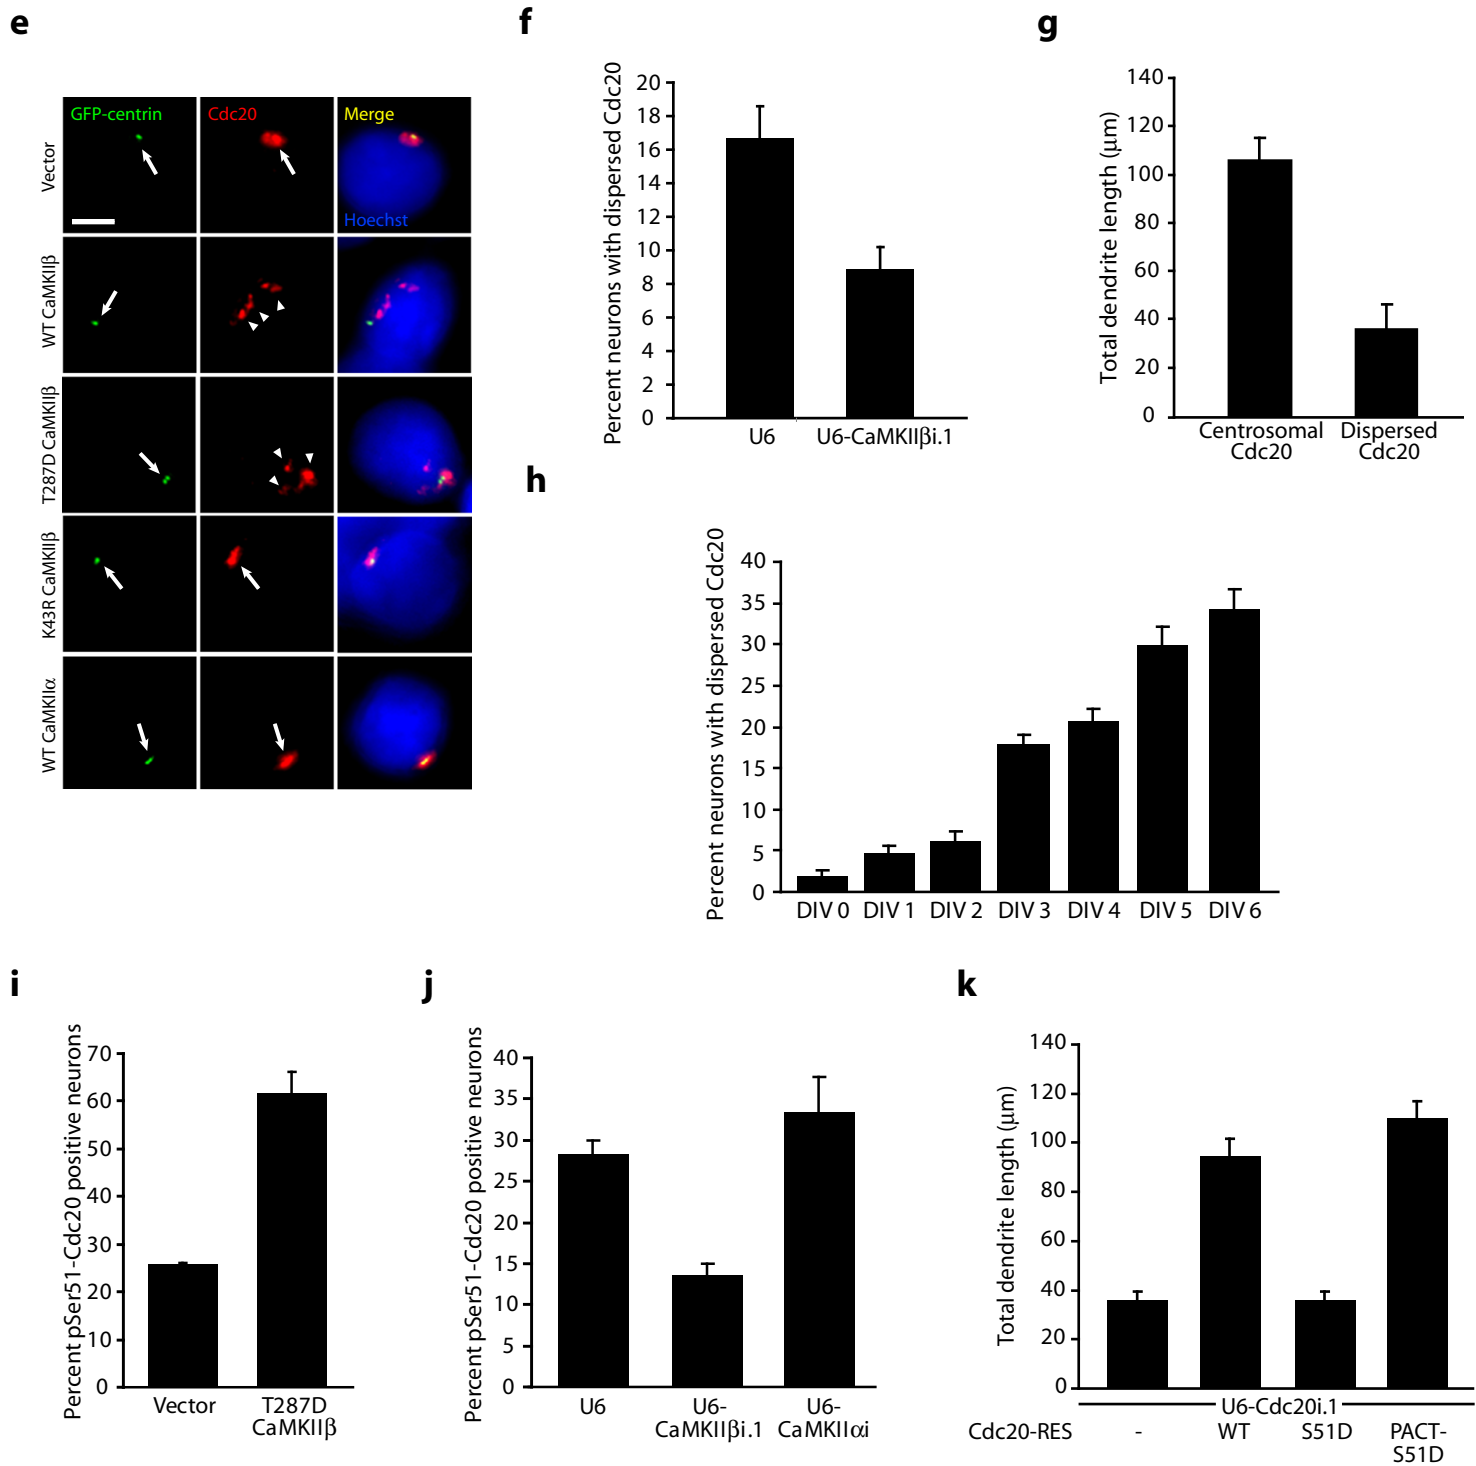

**Supplementary Figure 9. CaMKII $\beta$  promotes Cdc20 phosphorylation and dispersion from the centrosome in neurons.**

**a**, Lysates of cortical neurons were immunoprecipitated with the Cdc20 or control (IgG) antibody and immunoblotted with the CaMKII $\beta$  or Cdc20 antibody. Asterisk indicates IgG heavy chain.

**b**, Lysates of granule neurons electroporated with the CaMKII $\beta$  RNAi or control U6 plasmid were immunoblotted with the CaMKII $\beta$ , Cdc20, phosphoSer51-Cdc20, or actin antibody.

**c**, Granule neurons transfected with the Cdc20 RNAi or control U6 plasmid together with an expression plasmid encoding WT Cdc20-RES, S51A Cdc20-RES, S84A Cdc20-RES, S86A Cdc20-RES, or control vector and the GFP expression plasmid were analyzed as in Fig. 1d. S51A Cdc20-RES, but not S84A Cdc20-RES or S86A Cdc20-RES, significantly increased total dendrite length compared to WT Cdc20-RES in the background of Cdc20 RNAi (ANOVA,  $p < 0.0001$ ). 360 neurons were measured.

**d**, Granule neurons transfected with the expression plasmid encoding WT CaMKII $\beta$ , T287D CaMKII $\beta$ , K43R CaMKII $\beta$ , CaMKII $\alpha$ , or control vector together with the fGFP expression plasmid were analyzed as in Fig. 6a. Arrows indicate Cdc20 localized to the centrosome, while arrowheads denote dispersed Cdc20. Expression of WT or T287D CaMKII $\beta$ , but not K43R CaMKII $\beta$  or CaMKII $\alpha$ , induced dispersion of the centrosomal perinuclear Cdc20 punctum. Scale bar = 5  $\mu$ m.

**e**, Granule neurons transfected with the expression plasmid encoding WT CaMKII $\beta$ , T287D CaMKII $\beta$ , K43R CaMKII $\beta$ , CaMKII $\alpha$ , or control vector together with an expression plasmid encoding GFP-centrin were analyzed as in (d). Arrows indicate the location of the centrosome based on GFP-centrin immunofluorescence, while arrowheads denote dispersed Cdc20. Expression of WT or T287D CaMKII $\beta$ , but not K43R CaMKII $\beta$  or CaMKII $\alpha$ , induced dispersion of endogenous Cdc20 away from the centrosome as marked by GFP-centrin immunofluorescence. Scale bar = 5  $\mu$ m.

**f**, Granule neurons transfected with the CaMKII $\beta$  RNAi or control U6 plasmid together with the fGFP expression plasmid were analyzed as in (d). The percentage of neurons displaying dispersed endogenous Cdc20 was significantly reduced in CaMKII $\beta$  knockdown neurons compared to control U6-transfected neurons (t-test;  $p < 0.01$ ). 334 neurons were analyzed.

**g**, Granule neurons transfected with the T287D CaMKII $\beta$  expression plasmid together with the fGFP expression plasmid were analyzed as in (d). Total dendrite length was significantly reduced in neurons with dispersed endogenous Cdc20 compared to neurons with centrosomally-enriched endogenous Cdc20 (t-test,  $p < 0.01$ ). 180 neurons were measured.

**h**, Granule neurons transfected with the GFP-centrin expression plasmid were fixed on DIV0-6 and analyzed as in (e). The percentage of neurons displaying dispersed endogenous Cdc20 was significantly increased with maturation of neurons (ANOVA;  $p < 0.0001$ ). 360 neurons per condition were analyzed.

**i**, Granule neurons transfected with the T287D CaMKII $\beta$  expression plasmid or control vector together with the fGFP expression plasmid were analyzed as in Fig. 6g. The percentage of neurons with phosphoSer51-Cdc20 immunofluorescence was significantly increased in T287D CaMKII $\beta$ -expressing neurons compared to control vector-transfected neurons (t-test,  $p < 0.005$ ). 121 neurons were analyzed.

**j**, Granule neurons transfected with the CaMKII $\beta$  or CaMKII $\alpha$  RNAi or control U6 plasmid together with the GFP-centrin expression plasmid were analyzed as in (i). The percentage of neurons with phosphoSer51-Cdc20 immunofluorescence was significantly reduced in CaMKII $\beta$  knockdown neurons compared to control U6-transfected neurons. In contrast, CaMKII $\alpha$  knockdown had little or no effect on the percentage of neurons with phosphoSer51-Cdc20 immunofluorescence compared to control U6 transfection (ANOVA,  $p < 0.001$ ). 414 neurons were analyzed.

**k**, Granule neurons transfected with the Cdc20 RNAi or control U6 plasmid together with an expression plasmid encoding WT Cdc20-RES, S51D Cdc20-RES, PACT-S51D Cdc20-RES, or control vector and the GFP expression plasmid were analyzed as in (c). WT Cdc20-RES and PACT-S51D Cdc20-RES, but not S51D Cdc20-RES, significantly increased total dendrite length compared to control vector in the background of Cdc20 RNAi (ANOVA,  $p < 0.0001$ ). 360 neurons were measured.

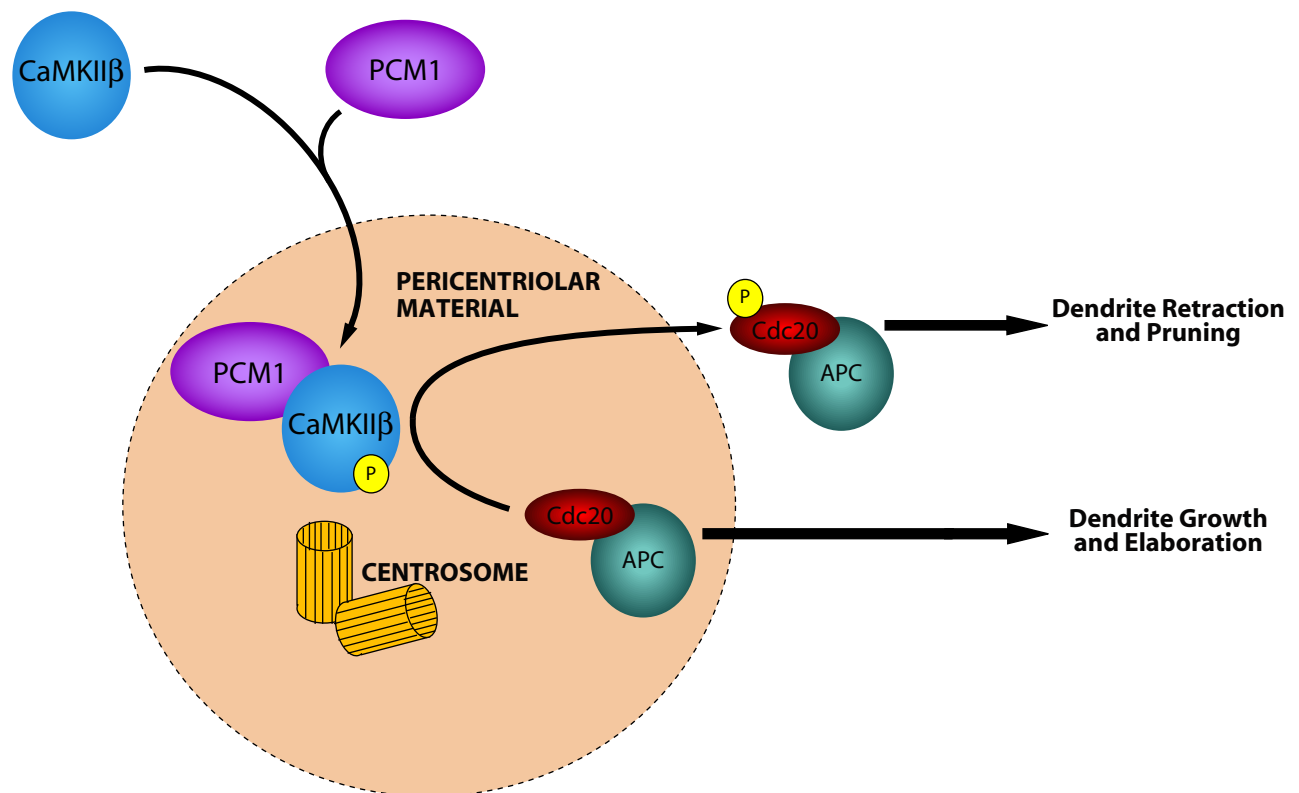

**Supplementary Figure 10. Model for the centrosomal CaMKII $\beta$  signaling pathway in the control of dendrite patterning in the mammalian brain.**

Fig. 1a

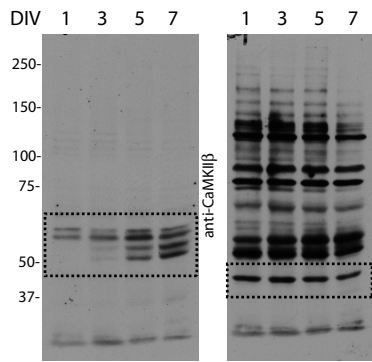

Fig. 1b

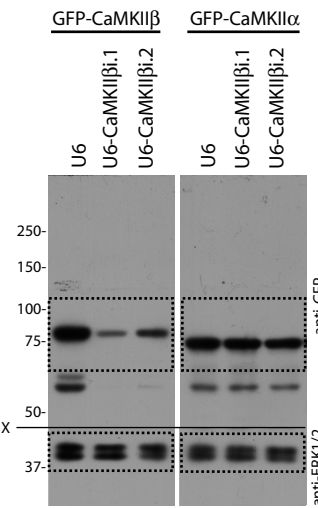

Fig. 1c

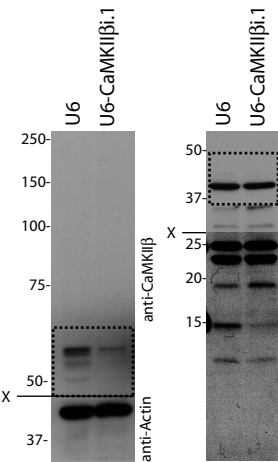

Fig. 1h

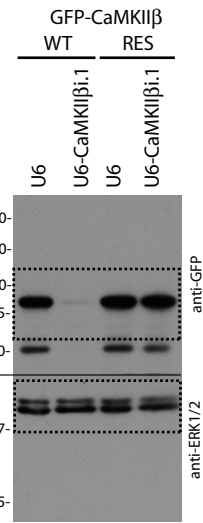

Fig. 3e

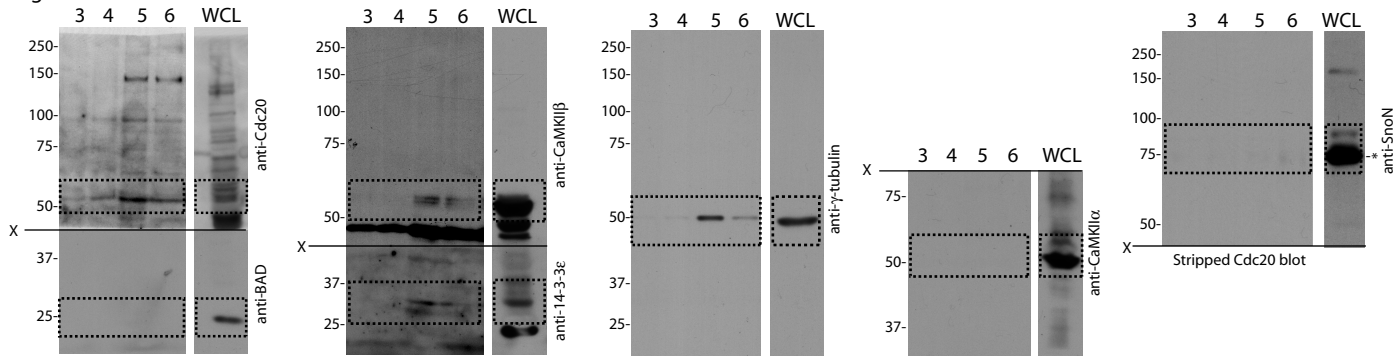

Fig. 4a

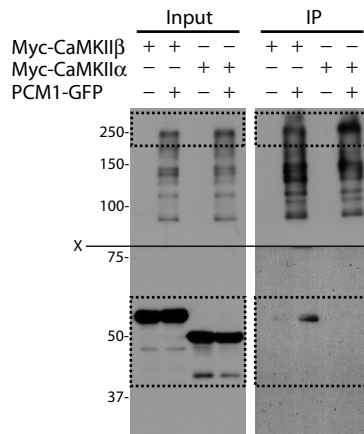

Fig. 4b

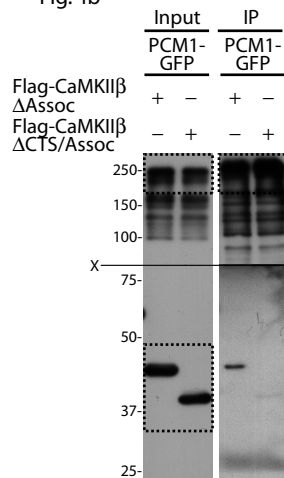

Fig. 4c

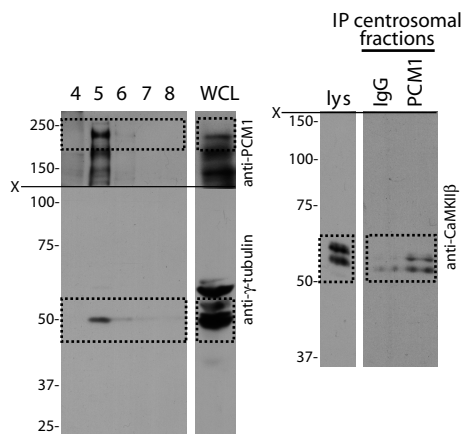

Fig. 4d

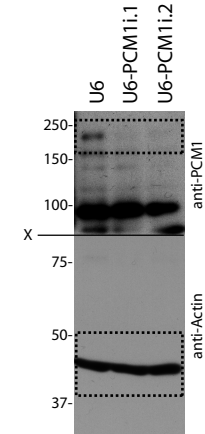

Fig. 5a

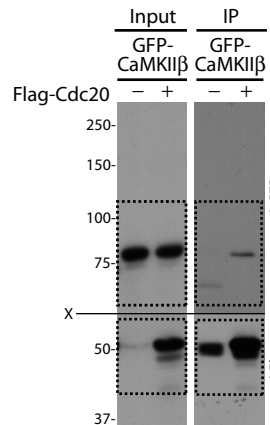

Fig. 5b

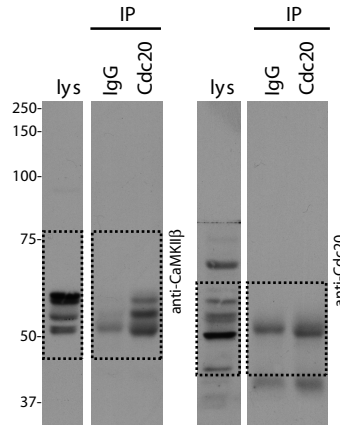

Fig. 5c

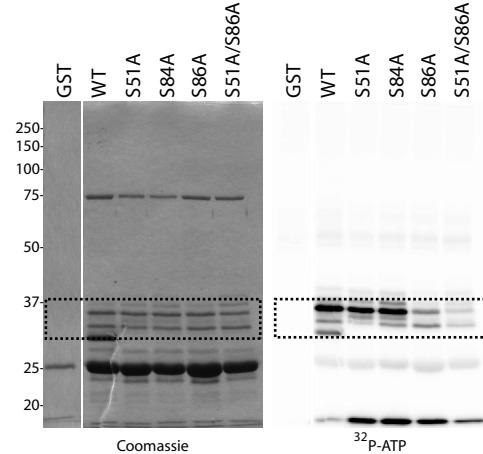

Fig. 5d

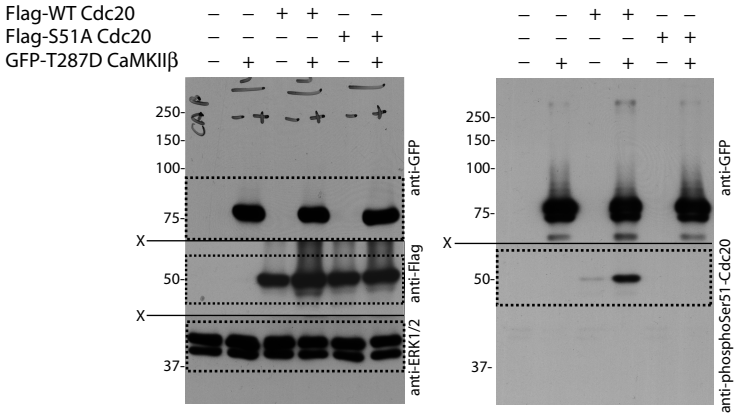

Fig. 5f

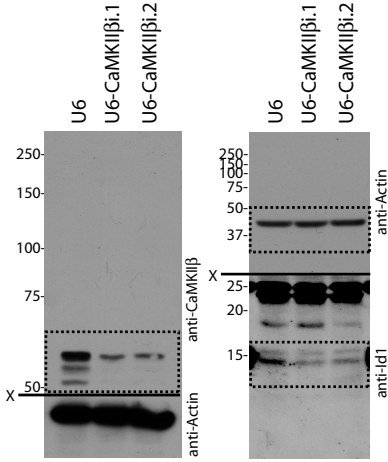

**Supplementary Figure 11. Full-length blots for all cropped immunoblots shown in the main figures.** Blots were incubated with primary antibody as indicated. Dashed boxes denote the cropped regions shown in figures, X's mark point where blots were cut, and asterisk indicates non-specific band.

### Supplemental References

1. Konishi, Y., Stegmuller, J., Matsuda, T., Bonni, S. & Bonni, A. Cdh1-APC controls axonal growth and patterning in the mammalian brain. *Science* **303**, 1026-1030 (2004).
2. Stegmuller, J., *et al.* Cell-intrinsic regulation of axonal morphogenesis by the Cdh1-APC target SnoN. *Neuron* **50**, 389-400 (2006).
